1 **Dual function for Tango1 in secretion of bulky cargo and in ER-Golgi**  
2 **morphology**

3

4

5 Running title: Dual function of Tango1

6

7

8 Rios-Barrera LD<sup>1\*</sup>, Sigurbjörnsdóttir S<sup>1,3\*</sup>, Baer M<sup>2,4</sup>, Leptin M<sup>1,2,5</sup>.

9

10 <sup>1</sup> European Molecular Biology Laboratory, 69117 Heidelberg, Germany

11 <sup>2</sup> Institute of Genetics, University of Cologne, 50674 Cologne, Germany

12 <sup>3</sup> Current address: University of Iceland, 101 Reykjavík, Iceland

13 <sup>4</sup> Current address: Ludwig-Maximilian University of Munich, 81377 Munich, Germany

14 <sup>5</sup> Correspondence: mleptin@uni-koeln.de

15 \* These authors contributed equally to this work

16

17

18 Keywords: Tango1, ER/Golgi, secretion, Drosophila

19

20

21 **Abstract**

22 Tango1 helps the efficient delivery of large proteins to the cell surface. We show here  
23 that loss of Tango1, in addition to interfering with protein secretion, causes ER stress  
24 and defects in cell and ER/Golgi morphology. We find that the previously observed  
25 dependence of smaller cargos on Tango1 is a secondary effect, due to an indirect  
26 requirement: if large cargos like Dumpy, which we identify here as a new Tango1  
27 cargo, are removed from the cell, non-bulky proteins re-enter the secretory pathway.  
28 Removal of the blocking cargo also attenuates the ER-stress response, and cell  
29 morphology is restored. Thus, failures in the secretion of non-bulky proteins, ER  
30 stress and defective cell morphology are secondary consequences of the retention of  
31 cargo. By contrast, the ERES defects in Tango1-depleted cells persist in the absence  
32 of bulky cargo, showing that they are due to a secretion-independent function of  
33 Tango1. Therefore, the maintenance of proper ERES architecture may be a primary  
34 function for Tango1.

35

## 36 Introduction

37 The endoplasmic reticulum (ER) serves as a major factory for protein and lipid  
38 synthesis. Proteins and lipoproteins produced in the ER are packed into COPII-  
39 coated vesicles, which bud off at ER exit sites (ERES) and then move towards the  
40 Golgi complex where they are sorted to their final destinations. Regular COPII  
41 vesicles are 60 - 90 nm in size, which is sufficient to contain most membrane and  
42 secreted molecules (Szul and Sztul, 2011). The loading of larger cargo requires  
43 specialized machinery that allows the formation of bigger vesicles to accommodate  
44 these bulky molecules. Tango1 (Transport and Golgi organization 1), a member of  
45 the MIA/cTAGE (melanoma inhibitory activity/cutaneous T cell lymphoma-associated  
46 antigen) family, is a key component in the loading of such large molecules into  
47 COPII-coated vesicles. Molecules like collagens and ApoB (apolipoprotein B)-  
48 containing chylomicrons are 250-450 nm long and rely on Tango1 for their transport  
49 out of the ER, by physically interacting with Tango1 or Tango1 mediators at the  
50 ERES (Pfeffer, 2016; Saito et al., 2009; Santos et al., 2016).

51 Tango1 is an ER transmembrane protein that orchestrates the loading of its cargo  
52 into vesicles by interacting with it in the ER lumen. The interaction of Tango1 with its  
53 cargo then promotes the recruitment of Sec23 and Sec24 coatomers on the  
54 cytoplasmic side, while it slows the binding of the outer layer coat proteins Sec13 and  
55 Sec31 to the budding vesicle. This delays the budding of the COPII carrier (Saito et  
56 al., 2009). Tango1 also recruits additional membrane material to the ERES from the  
57 Golgi intermediate compartment (ERGIC) pool, thereby allowing vesicles to grow  
58 larger (Santos et al., 2015). It also interacts directly with Sec16, which is proposed to  
59 enhance cargo secretion (Maeda et al., 2017).

60 Apart from bulky proteins, some heterologous, smaller proteins like secreted  
61 horseradish peroxidase (ssHRP, 44 kDa) and secreted GFP (27 kDa) also depend  
62 on Tango1 for their secretion (Nogueira et al., 2014). Unlike for collagen or ApoB,  
63 there is no evidence for a direct interaction between Tango1 and ssHRP or secreted  
64 GFP. It is not clear why Tango1 would regulate the secretion of these molecules, but  
65 it has been proposed that in the absence of Tango1, the accumulation of non-bulky  
66 proteins at the ER might be due to abnormally accumulated Tango1 cargo clogging  
67 the ER (Nogueira et al., 2014; Saito et al., 2009); however, this has not been tested  
68 experimentally.

69 *Drosophila* Tango1 is the only member of the MIA/cTAGE family found in the fruit fly,  
70 which simplifies functional studies. Like vertebrate Tango1, the *Drosophila* protein

71 participates in the secretion of collagen (Lerner et al., 2013; Pastor-Pareja and Xu,  
72 2011). And as in vertebrates, ssHRP, secreted GFP and other non-bulky molecules  
73 like Hedgehog-GFP also accumulate in the absence of Tango1 (Bard et al., 2006; Liu  
74 et al., 2017). These results have led to the proposal that Tango1 participates in  
75 general secretion. However, most of the evidence for these conclusions comes from  
76 overexpression and heterologous systems that might not reflect the physiological  
77 situation.

78 Here, we describe a *tango1* mutant allele that we identified in a mutagenesis screen  
79 for genes affecting the structure and shape of terminal cells of the Drosophila  
80 tracheal system (Baer et al., 2007). Tracheal terminal cells form highly ramified  
81 structures with branches of more than 100  $\mu$ m in length that transport oxygen  
82 through subcellular tubes formed by the apical plasma membrane. Their growth  
83 relies heavily on membrane and protein trafficking, making them a very suitable  
84 model to study subcellular transport. We used terminal cells to study the function of  
85 Tango1, and we found that loss of Tango1 affects general protein secretion indirectly,  
86 and it also leads to defects in cell morphology and in the structure of the ER and  
87 Golgi. The defects in ER and Golgi organization of cells lacking Tango1 persist even  
88 in the absence of Tango1 cargo.

89 We identify a new bulky cargo for Tango1 in Drosophila. Our studies have allowed us  
90 to explain why in the absence of Tango1, non-bulky proteins accumulate in the ER in  
91 spite of not being direct Tango1 cargos. We show that these cargos are retained in  
92 the ER as a consequence of non-secreted bulky proteins interfering with their  
93 transport. However, the effect of loss of Tango1 on ER/Golgi morphology can be  
94 uncoupled from its role in bulky cargo secretion.

95

96

## 97 **Materials and Methods**

### 98 **Fly stocks and genetics**

99 All experiments were done at 25°C in standard conditions. To generate homozygous  
100 mutant *tango1* terminal cells we used the MARCM system (Baer et al., 2007), with  
101 the lines *hsFlp1.22; tub-GAL80, FRT40A; btl-GAL4, UAS-eGFP* (from Stefan  
102 Luschnig, University of Muenster, Germany), and the line *FRT40A* as control  
103 (Bloomington Drosophila Stock Center [BDSC] #5615). *2L3443* was mapped by  
104 complementation tests with *Df(2L)BSC7* (BDSC #6374), *Df(2L)BSC6* (BDSC #6338)

105 and *Df(2L)BSC187* (BDSC #9672), followed by fine mapping through ORF  
106 sequencing of the genes within the segment genetically defined to contain the  
107 mutation. Final complementation tests with *tango1*<sup>GS17108</sup> (Kyoto Drosophila Genetic  
108 Resource Center [DGRC] #206906), and *tango1*<sup>GS15095</sup> (DGRC #206078) confirmed  
109 2L3443 as a *tango1* allele.

110 The lines used as drivers for UAS constructs were *SRF-gal4* (Guillemin et al., 2001),  
111 *Lpp-gal4* (Palm et al., 2012), *nub-gal4* (Pastor-Pareja, and Xiu, 2014, #63148), *repo-*  
112 *gal4* (from Christian Klämbt, University of Münster, Germany), and *sr-gal4* (from  
113 Frank Schnorrer, Developmental Biology Institute of Marseille (IBDM), France). The  
114 following lines were obtained from Vienna Drosophila Resource Center: *ergic53*<sup>TRG</sup>  
115 (#318063), *lanA*<sup>TRG</sup> (#318155), *lanB1*<sup>TRG</sup> (#318180) and *BM-40-SPARC*<sup>TRG</sup>  
116 (#318015), which are fosmid constructs expressing GFP fusion proteins at  
117 endogenous levels (Sarov et al., 2016), and *UAS-pio-IR* (#107534). The *UAS-*  
118 *tango1-IR* (#11098R-3) and *UAS-vkg-IR* (#16858R-1) were obtained from the  
119 National Institute of Genetics Fly Stock Center, Japan. *dpy-YFP* and *UAS-dpy-IR* are  
120 from Barry Thompson, The Francis Crick Institute, UK (Ray et al., 2015). Collagen-  
121 GFP is a protein trap insertion of GFP in the *vkg* locus resulting in a fusion of  
122 collagen and GFP (Morin et al., 2001). *UAS-crb*<sup>extraTM</sup>-GFP is a construct where the  
123 cytoplasmic end of Crb was replaced by GFP (Pellikka et al., 2002). *UAS-Gasp-GFP*  
124 is from Christos Samakovlis, Stockholm University, Sweden (Tiklova et al., 2013).  
125 *UAS-Xbp1-GFP* is from Pedro Domingos, Nova University of Lisbon, Portugal (Ryoo  
126 et al., 2007). The following lines were obtained from BDSC: *UAS-ManII-GFP*  
127 (#65248), *UAS-RFP-KDEL* (#30910 and #30909), *UAS-mCD8mCherry* (#27392),  
128 *UAS-myrRFP* (#63148). *UAS-βPS-Integrin-Venus* was generated by subcloning  
129 *βPS-Integrin-Venus* from *pUbi-βPS-Integrin-Venus* [from Guy Tanentzapf, University  
130 of British Columbia, Canada (Yuan et al., 2010)] into the *pUASTattB* vector and then  
131 inserting in the third chromosome (VK33, BDSC #9750). *UAS-tango1-GFP* was  
132 generated by cloning the full-length *tango1* cDNA (GH02877) into pDONR221  
133 (Gateway System, Invitrogen). This was recombined into the destination vectors  
134 pTWG from the Drosophila Gateway Vector Collection using the Gateway LR  
135 reaction. The construct was then subcloned into *pUASTattB* and injected into VK33.

136

### 137 **Whole mount sample preparation, microscopy and analyses**

138 For tracheal terminal cell analyses, third instar wandering larvae were heat-fixed in  
139 Halocarbon oil for 30 seconds at 65°C. For tendon cell analyses, pupae at 24h after

140 puparium formation were hand-peeled and immobilized with heptane glue in MatTek  
141 plates with Halocarbon oil. In both cases, samples were imaged immediately using a  
142 Zeiss LSM 780 confocal microscope. Quantitative analyses of the number of  
143 branching points and air-filling were performed in dorsal terminal cells in metameres  
144 3-6 of heat-fixed larvae. Branches were counted manually in FIJI (Schindelin et al.,  
145 2012). Analysis of air-filling was performed by visualizing the presence of lumen  
146 using light transmission.

147

### 148 **Immunofluorescence staining**

149 We used the following antibodies: guinea pig anti-Tango1 (1:400, from Sally Horne-  
150 Badovinac, University of Chicago, USA), rabbit anti-Sec16 (1:600, from Catherine  
151 Rabouille, Hubrecht Institute, Netherlands), rat anti-Crb (1:500, from Elisabeth Knust,  
152 MPI-CBG, Germany), rabbit anti-Pio [1:300, from Markus Affolter, University of Basel,  
153 Switzerland (Jazwinska et al., 2003)], mouse anti- $\beta$ PS Integrin (1:200, DSHB  
154 #6G11), rabbit anti-Sec23 (1:200, Thermo Scientific #PA1-069), rabbit anti-GM130  
155 (1:500, Abcam #ab30637), and rabbit anti-Dof [1:200 (Vincent et al., 1998)]. Alexa-  
156 conjugated antibodies from Thermo Scientific: Alexa568 goat anti-mouse (A-11031),  
157 Alexa568 goat anti-rat (A-11077), Alexa647 goat anti-rat (A-21247), Alexa568 goat  
158 anti-rabbit (A-11036), Alexa647 goat anti-rabbit (A-21245), Alexa568 goat anti-guinea  
159 pig (A-11075), Alexa647 goat anti-guinea pig (A-21450). Chromotek's GFP-booster  
160 coupled to Atto488 (gba488) and RFP-booster coupled to Atto594 (rba594) were  
161 used to enhance signal from fluorescent reporters.

162 Third instar wandering larvae were collected, dissected, fixed using 4% PFA in PBS  
163 for 20 min and washed with PBTx (0.3% Triton X-100 in PBS) followed by 1 h  
164 incubation in blocking solution (PBTx, 1% BSA). Primary antibodies were diluted in  
165 blocking solution and incubated overnight at 4°C. After washing with PBTx, samples  
166 were incubated with secondary antibodies diluted in blocking solution at room  
167 temperature for 90 min followed by extensive washing using PBTx. Samples were  
168 mounted for imaging using Vectashield with DAPI (Vector Laboratories) and images  
169 acquired on Leica SP2, Zeiss LSM 780 or Zeiss LSM 880 Airyscan confocal  
170 microscopes.

171

### 172 **Western blotting**

173 We used guinea pig anti-Tango1 (1:10,000, mentioned above) and mouse anti-

174  $\beta$ Tubulin (1:5000, Amersham Life Science). HRP-conjugated antibodies were from  
175 Jackson ImmunoResearch Laboratories: goat anti-guinea pig-HRP (106-035-003)  
176 and goat anti-mouse-HRP (115-035-003). For each genotype, 20 embryos were  
177 selected, homogenized in loading buffer and heated for 5 min at 95°C. Samples were  
178 then separated by SDS-PAGE, transferred to PVDF membranes and subjected to  
179 immunodetection using the Luminata Crescendo Western HRP system.

180

## 181 **Image analyses**

182 All analyses were done using FIJI. We determined the amount of collagen  
183 surrounding terminal cells by quantifying the fluorescence intensity of collagen-GFP  
184 at the cell membrane close to the terminal cell body. We subtracted the background  
185 from the mean fluorescence intensity of an area of 3 x 30 pixels within a single  
186 confocal plane. To determine Sec16 particle size and number, and Dpy and laminin  
187 accumulation, we masked the channel of interest with the contour of the cell or tissue  
188 of interest, and then segmented individual dots from maximum projection images. For  
189 Dpy accumulation in wing discs, we used the plot profile function. All images within  
190 an experiment were acquired using the same microscope settings.

191

## 192 **Statistical analyses**

193 We used GraphPad Prism 6 for all statistical analyses. Plots were generated using  
194 GraphPad Prism 6 or Microsoft Excel.

195

196

## 197 **Results**

### 198 **Identification of a mutation in *tango1***

199 Terminal cells of the tracheal system extend long subcellular branches that transport  
200 gas through tubes formed by the apical plasma membrane. The tubes can be easily  
201 visualized by bright field microscopy because of the difference in refractive index  
202 between the cytoplasm and the gas, providing a simple readout for branch  
203 maturation (Tsarouhas et al., 2007). In a screen for genes necessary for tracheal  
204 terminal cell branching, we identified a mutation, 2L3443, which caused air-filling  
205 defects and reduced branch numbers in homozygous mutant terminal cells [Fig. 1A-

206 D (Baer et al., 2007)]. The mutation is embryonic semi-lethal (33.3% of homozygous  
207 embryos failed to hatch), and survivors died at early larval stages. We mapped this  
208 mutation by SNP recombination (Berger et al., 2001) and by complementation tests  
209 with deficiencies to the region 26D10-26F3 on the cytogenetic map (Fig. S1A). We  
210 identified a mutation within the ORF of *tango1*, and confirmed it is allelic to other  
211 *tango1* mutant alleles (Figure S1A'). The mutation introduces a premature stop  
212 codon in amino acid 1341 (Arginine to stop codon) downstream of the Proline-rich  
213 domain (PRD) that results in a truncation of the last 89 amino acids of the predicted  
214 protein (Fig. S1B, C). The missing segment contains an arginine-rich domain that has  
215 no predicted interaction partners. A Tango1-GFP construct expressed under a  
216 trachea-specific promoter suppressed the mutant phenotype (Fig. 1C-D) and an  
217 interfering RNA (*tango1*-IR) expressed specifically in terminal cells caused the same  
218 air-filling defects and reduction in branch number (Fig. 2A-B, E), confirming that  
219 *tango1* disruption was responsible for the branching defects.

220 To determine the role of Tango1 in terminal cells, we first looked at its subcellular  
221 distribution. As shown recently for other tissues (Liu et al., 2017; Raote et al., 2017),  
222 Tango1 assembles into ring-like structures in tracheal terminal cells, and co-localizes  
223 with the ERES marker Sec16 (Fig. 1E). The truncated Tango1<sup>2L3443</sup> protein fails to  
224 colocalize with Sec16, and Sec16 distribution itself is also altered in *tango1*<sup>2L3443</sup>  
225 mutant cells and upon *tango1* knockdown (Fig. 1F and Fig. S1E). While in control  
226 cells Sec16 particles show a homogenous distribution with a narrow range of sizes  
227 with a mean/median of 0.54 $\mu\text{m}^2$ /0.49 $\mu\text{m}^2$ , cells lacking Tango1 contain larger range  
228 of sizes with a mean/median of 0.44 $\mu\text{m}^2$ /0.29 $\mu\text{m}^2$  (Fig. 1E-F, S1D-E).

229 Golgi morphology is also abnormal in *tango1*<sup>2L3443</sup> cells, as shown by the distribution  
230 of the Golgi marker ManII-GFP relative to Sec16. In control cells, Sec16 and ManII-  
231 GFP are seen as juxtaposed spots, whereas in *tango1*<sup>2L3443</sup> mutant cells ManII-GFP  
232 seems to enclose Sec16 particles (Fig. S1F-G), consistent with previous studies  
233 suggesting the retention of ManII-GFP near the ER (Bard et al., 2006). RNAi against  
234 *tango1* in terminal cells also induced abnormal aggregation of the Golgi marker  
235 ERGIC53 (Fig. 1G-H).

236

### 237 **The role of Tango1 in terminal cells**

238 Tango1 has been studied for its role in the trafficking of collagen in cultured  
239 mammalian cells and in *Drosophila* fat body cells, the main collagen producers in the  
240 fly (Pastor-Pareja and Xu, 2011; Saito et al., 2009). Terminal cells are surrounded by

241 collagen, and although according to expression data collagen may be expressed only  
242 at minimal levels in tracheal cells, it was possible that the defects seen in tracheal  
243 cells might be due to failures in the secretion of collagen. To test this, we knocked  
244 down collagen (encoded by the gene *viking*, *vkg*) specifically in terminal cells. This  
245 did not result in any morphological defects of the type that loss of *Tango1* caused  
246 (Fig. S2A). We also compared the effects of knocking down *tango1* either in terminal  
247 cells or in the fat body. We found that collagen levels surrounding terminal cells are  
248 affected only when *tango1* is knocked down in the fat body but not when it is absent  
249 in terminal cells (Fig. S2B-G). These experiments show first that the collagen  
250 surrounding terminal cells is not produced by the terminal cells but mostly, if not  
251 entirely, by the fat body, and secondly, that the defects resulting from *tango1* loss-of-  
252 function in terminal cells cannot be explained by a defect in the transport of collagen.

253 If the defects in *tango1* mutant terminal cells cannot be explained by failure of  
254 collagen secretion, then they must be due either to a failure to transport to the cell  
255 surface other molecules essential for tracheal function, or to a function unrelated to  
256 the secretion of specific substrates (for example, a global failure within the secretory  
257 pathway).

258 We analysed the distribution of a range of cell surface and secreted proteins in  
259 *Tango1*-depleted terminal cells. These included markers for the basal and apical cell  
260 membranes, because morphological defects in epithelial cells are often associated  
261 with defective cell polarity. The localization of bPS integrin at the outer, basal  
262 membrane of the cell was not affected by *tango1* knockdown (Fig. 2F-G). By  
263 contrast, the apical membrane protein Crumbs (*Crb*), normally present at the luminal  
264 plasma membrane (Fig. 2H), failed to reach its normal destination and was instead  
265 found dispersed throughout the cytoplasm (Fig. 2I). These observations favour a role  
266 for *Tango1* in the transport of specific proteins rather than in general secretion.

267 Since the suggested role for *Tango1* is to aid the secretion of very large cargos, we  
268 examined the distribution of Dumpy (*Dpy*), the largest protein encoded in the  
269 *Drosophila* genome, with a size of 2.5 MDa and a length of 800 nm (Misra et al.,  
270 2002; Wilkin et al., 2000). *Dpy* contains EGF-repeat domains and a Zona Pellucida  
271 (ZP) domain. It mediates the attachment between cells and the chitinous apical  
272 extracellular matrix (aECM), through its interaction with *Pio*, a ZP transmembrane  
273 protein (Ozturk-Colak et al., 2016). We visualized *Dpy* through a YFP insertion at the  
274 *dpy* locus that results in a fusion protein expressed at endogenous levels, *Dpy*-YFP  
275 (Ray et al., 2015).



276 In cells of the tracheal dorsal trunks we distinguished two pools of Dpy: one that was  
277 secreted and was seen within the lumen of the trachea, the other in the cytoplasm, in  
278 the form of spots, which were presumably vesicles containing Dpy on its secretion  
279 route (Fig. 2J). We found that a subset of the Dpy particles was partly or fully  
280 surrounded by Tango1 and in close proximity to the Golgi marker GM130 (Fig. 2J,  
281 insets). In terminal cells, Dpy-YFP is present in the lumen of the cells, where it is  
282 enriched at the plasma membrane, together with its binding partner Pio (Fig. 2K). In  
283 *tango1* knockdown terminal cells, neither Dpy-YFP nor Pio were found in the lumen,  
284 and they instead accumulated in the cytoplasm (Fig. 2L).

285 To test whether the mislocalisation of any of the molecules that we analysed was  
286 responsible for the defects seen in tracheal cells, we depleted Dpy and Pio from  
287 terminal cells. Neither *dpy* nor *pio* knockdown produced air-filling defects or a  
288 reduction in the number of branches (Fig. 2C-E), in spite of efficient silencing of *pio*  
289 expression (Fig. S3A-B). Therefore the morphological defects resulting from loss of  
290 Tango1 cannot be explained by inefficient Dpy or Pio secretion. Similarly,  
291 mislocalisation of Crb is not sufficient to explain the *tango1* loss-of-function  
292 phenotype, since *crb* homozygous mutant terminal cells do not show branching  
293 defects that resemble the *tango1* phenotype (Schottenfeld-Roames et al., 2014).

294 In summary, regarding the dependence of different cargos on Tango1 we have found  
295 three cases: Dpy represents a cargo that fits the expected characteristic of Tango1  
296 substrates of being very large; Crb is a cargo that depends on Tango1 although it is  
297 not large; and finally, bPS integrin is a cargo that does not depend on Tango1. To  
298 learn more about the rules and generalities of Tango1-dependent secretory cargos,  
299 we examined other tissues.

300

### 301 **Effect of Tango1 loss-of-function on Dpy in wing discs, glial cells and tendons.**

302 Dpy serves as a scaffold that anchors tissues to the aECM and supports tissue  
303 shape changes in many organs, and its function has been most extensively studied  
304 in the wing disc (Ray et al., 2015). Knocking down *tango1* in the wing pouch resulted  
305 in intracellular accumulation of Dpy-YFP (Fig. 3A, E). Loss of Tango1 was again  
306 associated with changes in the distribution of Sec16. This was particularly evident  
307 when *tango1* was knocked down in a stripe across the disc using *ptc-gal4*. We found  
308 that in the absence of Tango1, the number of Sec16 particles per area was reduced  
309 (Fig. 3B, F).

310 Tango1 has previously been shown to be active in larval glial cells and pupal tendons  
311 (Petley-Ragan et al., 2016; Tiwari et al., 2015) and we found that these cell types are  
312 surrounded by Dpy-YFP (Fig. 3C, H), consistent with expression reports on other  
313 developmental stages (Knowles-Barley et al., 2010; Wilkin et al., 2000). Depletion of  
314 Tango1 resulted in the intracellular accumulation of Dpy-YFP in both tissues (Fig. 3D,  
315 G, I). We compared the localization of the intracellular Dpy-YFP spots in glial and  
316 tendon cells with that of KDEL-RFP, an ER marker. Dpy-YFP co-localized with  
317 KDEL-RFP in cells lacking Tango1, suggesting Dpy remains within the ER in these  
318 cells (Fig. 3C-D, H-I). These experiments indicate that the role of Tango1 in Dpy  
319 secretion is general, and not restricted to tracheal cells. Whereas the tissues studied  
320 so far each have their own, specific cargos that depend on Tango1, they also share  
321 Dpy as a common cargo.

322

### 323 **Direct and indirect effects of loss of Tango1 on cargo accumulation in the fat** 324 **body**

325 Tango1-dependent trafficking has been most thoroughly characterized in the fat  
326 body. In fat body cells lacking Tango1, a number of cargos including collagen are not  
327 delivered to the cell surface, and the structure of the ER and Golgi are abnormal (Liu  
328 et al., 2017; Pastor-Pareja and Xu, 2011). Fat body cells do not express Dpy, and as  
329 in tracheal cells, endogenous  $\beta$ PS integrin distribution is not affected by lack of  
330 Tango1 (Fig. 4A-B).

331 We noticed that independent of size, secretion of several overexpressed molecules  
332 was impaired upon *tango1* knockdown in fat body cells. This included Gasp-GFP,  
333 with a molecular weight of only 55 kDa (Fig. S3C-D), and overexpressed  $\beta$ PS  
334 integrin-Venus, even though endogenous  $\beta$ PS integrin was unaffected (Fig. 4C-D).  
335 Previous reports have also shown that in *Drosophila*, the absence of Tango1 leads to  
336 the accumulation of other overexpressed small cargos like secreted HRP and GFP,  
337 and of Hedgehog-GFP (Bard et al., 2006; Liu et al., 2017). This was also observed in  
338 cultured mammalian cells for secreted HRP and GFP (Nogueira et al., 2014; Saito et  
339 al., 2009). In the case of mammalian cells, it was suggested that HRP accumulation  
340 was caused by unsecreted collagen blocking the secretory pathway (Nogueira et al.,  
341 2014). To test whether such a mechanism may explain the failure of smaller  
342 molecules to be secreted in *tango1*-deficient fat body cells, we studied whether the  
343 reduction of *vkg* would improve the secretion of small cargos by simultaneously  
344 knocking down *vkg* and *tango1*. We found that if in addition to *tango1*, we knocked

345 down *vkg*, this resulted in the rescue of the secretion of overexpressed  $\beta$ PS integrin  
346 (Fig. 4E-F) as well as overexpressed Crb fused to GFP (Crb-GFP, Fig. S4A-D). To  
347 exclude an artefactual amelioration of the *tango1*-knockdown phenotype because the  
348 second RNAi construct might reduce the efficiency of *tango1* knockdown, in this and  
349 further experiments we compared Tango1 and collagen levels in the double  
350 knockdown condition with individual *tango1* and *vkg* knockdowns and found that both  
351 targets were equally well silenced in the two conditions (Fig. S4E-H). These results  
352 show that both overexpressed  $\beta$ PS integrin-Venus and Crb-GFP can be delivered to  
353 the membrane in the absence of Tango1 if collagen is also removed, suggesting that  
354 their accumulation upon *tango1* knockdown is an indirect effect of collagen  
355 accumulation.

356 We also wanted to test whether SPARC and laminins, two other cargos known to  
357 depend on Tango1 for their secretion [(Petley-Ragan et al., 2016; Tiwari et al., 2015),  
358 Fig. 5A-B, E-F and Fig. S3E-F] might be blocked by collagen accumulation in the fat  
359 body. These experiments were inconclusive because loss of collagen itself lead to  
360 laminins and SPARC retention in the ER (Fig. 5C, G; Fig. S3G), and simultaneous  
361 collagen and Tango1 knockdown therefore did not rescue laminin or SPARC  
362 secretion (Fig. 5D, H; Fig. S3H).

363

#### 364 **Direct and indirect effects of loss of Tango1 on cargo accumulation in glial** 365 **cells and in terminal cells.**

366 Like overexpressed  $\beta$ PS integrin and Crb in the fat body, some of the Tango1-  
367 dependent cargos identified in tracheal, glial, wing epithelial and tendon cells are also  
368 not particularly bulky. We therefore investigated whether they might also not be direct  
369 substrates of Tango1. These tissues do not express detectable levels of collagen  
370 (Pastor-Pareja and Xu, 2011; Petley-Ragan et al., 2016; Tiwari et al., 2015), and it  
371 was therefore unlikely that unsecreted collagen was the blocking cargo. We therefore  
372 wondered whether Dpy, as another large Tango1 cargo might be blocking the  
373 secretory pathway.

374 Glial cells of the larval brain and of the peripheral nervous system have also been  
375 shown to need Tango1 for the secretion of laminin chains LanB1 and LanB2 (Petley-  
376 Ragan et al., 2016). Laminins are assembled into trimers composed of the LanB1,  
377 LanB2 and LanA subunits. All subunits are required for trimer secretion, but LanA  
378 can also be secreted as a monomer. We found that as has been shown for LanB1  
379 (Fig. S3I-J), *tango1* knockdown also resulted in LanA accumulation in the ER (Fig.

380 6A-B, E). It was puzzling that LanA was retained at the ER in glial cells lacking  
381 Tango1, considering that it should be able to be secreted as a monomer even when  
382 LanB1 and LanB2 are not secreted (Hamill et al., 2009). To test if accumulated  
383 intracellular Dpy might be responsible for this, we knocked down *tango1* and *dpy*  
384 simultaneously. We found that the defective secretion of both LanA and LanB1  
385 caused by lack of Tango1 was rescued by also silencing *dpy* (Fig. 6D-E, Fig. S3L;  
386 controls for knockdown efficiency in Fig. S5A-D).

387 In tracheal cells, where Crb delivery to the membrane was completely abolished by  
388 *tango1* knockdown (Fig. 2H-I, Fig. 7A-B), the additional knockdown of *dpy* caused  
389 Crb membrane localization to be re-established (Fig. 7D, controls for knockdown  
390 efficiency in Fig. S5E-H). In summary, the effect of loss of Tango1 on a broad range  
391 of cargos is indirect, with the proximal effect being the retention of one or perhaps a  
392 small number of direct substrates, which in turn blocks the proper trafficking of other  
393 molecules.

394

395 **Tango1 loss-of-function in terminal cells leads to ER stress in a Dpy-dependent**  
396 **manner.**

397 Our results so far pointed towards *tango1* loss-of-function in terminal cells and in  
398 other tissues affecting not only the secretion of its own cargo, but also that of others  
399 as a side effect of the ER being clogged by unsecreted cargo. Another documented  
400 consequence of loss of Tango1 is the activation of the ER stress response (Petley-  
401 Ragan et al., 2016). One of the inducers of ER stress is protein retention in the ER,  
402 and we therefore investigated whether the ER stress response was a direct  
403 consequence of loss of Tango1, or instead, the result of abnormal protein  
404 accumulation in the ER. To test this, we used the marker Xbp1-GFP, which is post-  
405 transcriptionally upregulated in response to ER stress (Coelho et al., 2013; Ryoo et  
406 al., 2007). We observed high levels of Xbp1-GFP in terminal cells lacking Tango1,  
407 but not in control or *dpy-IR* cells (Fig. 7A-C). When *tango1* and *dpy* were  
408 simultaneously depleted, Xbp1-GFP was no longer upregulated (Fig. 7D). Therefore,  
409 the ER stress response is also not a direct consequence of loss of Tango1, but the  
410 result of the incorrect trafficking of Dpy.

411 The original phenotype for which we identified the *tango1* mutation was defective  
412 terminal cell morphology. We argued above that this was not due to the loss of Dpy  
413 or Pio at the cell surface (Fig. 2C-E). Having found that ER stress and indirect  
414 retention of small cargos could be suppressed by removing primary cargos, we

415 wondered whether the morphological defects were also secondary to protein  
416 accumulation, or if they revealed a direct function of Tango1 independent of its role in  
417 secretion of Dpy. We found that the defects of branch number and branch air filling  
418 seen in *tango1* knockdown cells were significantly suppressed if *dpy* was also  
419 silenced (Fig. 8). This suggests that most of the deleterious effect of Tango1  
420 depletion on terminal cell morphology is a consequence of abnormal Dpy  
421 accumulation. Since loss of *dpy* itself has no effect on cell morphology, Dpy and the  
422 resulting failure in protein secretion or ER stress may be the cause for the defects in  
423 cell shape.

424

### 425 **Separable roles for Tango1 on ER/Golgi architecture and secretion**

426 A further defect others and we had observed to result from loss of Tango1 was the  
427 disruption of the normal organization of the Golgi and ER. Since the other defects we  
428 described above – failure to secrete a range of proteins and defective cell  
429 morphology – were indirect effects of Tango1 we wondered whether this might also  
430 be true for the distorted Golgi and ER, and whether these might also be caused by  
431 large cargo accumulation (in this case Dpy). However, we found that upon double  
432 *tango1* and *dpy* RNAi, Sec16 organization was not restored and we still observed a  
433 wide range of Sec16 particle sizes and staining intensities (Fig. 9D-F). Similar results  
434 were obtained for GM130, a Golgi marker; while control and *dpy-IR* cells showed a  
435 homogeneous size distribution of GM130-stained particles (Fig. 10A, C), in *tango1*  
436 and double knockdown cells the distribution of GM130 is altered (Fig. 10B, D). Given  
437 that in the double knockdown cells Dpy is no longer clogging the ER and that  
438 secretion of other molecules is re-established, these results indicate that Tango1 has  
439 an additional function in maintaining ER-Golgi morphology that is independent of its  
440 role in bulky cargo transport.

441

442

### 443 **Discussion**

444

445 We have described a novel role of Tango1, which we initially identified through its  
446 function in tracheal terminal cells and other tissues in *Drosophila* embryos, larvae  
447 and pupae. Due to their complex shapes and great size, terminal cells are a well  
448 suited system to study polarized membrane and protein trafficking, with the easily

449 scorable changes in branch number and maturation status providing a useful  
450 quantitative readout that serves as a proxy for functional membrane and protein  
451 trafficking machinery. Moreover, our analyses are conducted in the physiological  
452 context of different tissues in the intact organism.

453

#### 454 **Nature of the *tango1*<sup>2L3443</sup> allele**

455 The loss of function allele *tango1*<sup>2L3443</sup> has a stop codon 8 amino acids downstream  
456 of the PRD domain, and eliminates the 89 C-terminal amino acids of the full-length  
457 protein. It is unlikely that the mutation leads to a complete loss of function. First,  
458 terminal cells expressing an RNAi construct against *tango1* show stronger defects,  
459 with fewer branches per cell than homozygous *tango1*<sup>2L3443</sup> cells. Secondly, the  
460 mutant protein appears not to be destabilized nor degraded, but instead is present at  
461 apparently normal levels, albeit at inappropriate sites. Predictions of the deleted  
462 fragment of the protein suggest it is disorganized and that it contains an arginine-rich  
463 domain that has no known interaction partners and that is not present in human  
464 Tango1. In homozygous mutant terminal cells the mutant Tango1<sup>2L3443</sup> protein fails to  
465 localize at ERES. In mammalian Tango1, the PRD domain is necessary for the  
466 localization of Tango1 to the ERES and for its interaction with Sec23 and Sec16  
467 (Maeda et al., 2017; Saito et al., 2009), but since this domain is fully present in  
468 Tango1<sup>2L3443</sup>, our results mean that either the missing 89 C-terminal amino acids  
469 contain additional essential localization signals, or that the PRD domain is structurally  
470 affected by the truncation of the protein. We consider the latter less likely, as a  
471 truncation 8 amino acids downstream of the PRD domain is unlikely to destabilize the  
472 poly-proline motifs, especially as the overall stability of the protein does not seem to  
473 be affected. Furthermore, this region shows a high density of phospho-serines [Ser-  
474 1345, Ser-1348, Ser-1390 and Ser-1392 (Zhai et al., 2008)] suggesting it might serve  
475 as a docking site for adapter proteins or other interactors.

476

#### 477 **Possible causes of the cellular morphological defects**

478 Terminal cells lacking Tango1 have fewer branches than control cells, and are often  
479 not properly filled with air. This loss-of-function phenotype is not due to a direct  
480 requirement for Tango1, as it is suppressed by the simultaneous removal of Dpy. It  
481 also cannot be explained by the individual loss of *crb*, *p10* or *dpy*, since knocking  
482 down any of these genes has no effect on cell morphology. It is possible that the  
483 combined loss of these, and perhaps further proteins we have not tested, at the  
484 apical membrane might lead to defective branch formation or stability, but we believe  
485 the phenotype is more likely a secondary consequence of the general defects caused

486 by loss of Tango1 and the accumulation of Dpy in the ER. For example, these  
487 defects might lead to a failure to deliver sufficient lipids and membrane from the ER  
488 to the apical plasma membrane. Alternatively, the activation of the ER stress  
489 response that we observe upon loss of *tango1* might have additional side effects on  
490 cell morphology.

491

#### 492 **Dumpy, a new cargo of Tango1**

493 Collagen, with a length of 300 nm and ApoB chylomicrons with a diameter of >250  
494 nm, have both been biochemically validated as Tango1 cargos (Saito et al., 2009;  
495 Santos et al., 2016). These molecules are not expressed in terminal cells [this work  
496 and (Baer et al., 2012)], and therefore it was clear that Tango1 must have a different  
497 substrate in these cells. Given that Tango1 is known for the transport of bulky cargo,  
498 that Dpy is the largest *Drosophila* protein at 800 nm length, and that Dpy vesicles are  
499 associated with Tango1 rings in tracheal cells, we propose that Dpy is a further direct  
500 target of Tango1. Colocalization of Tango1 with its cargo has also been observed in  
501 other tissues: with collagen in *Drosophila* follicle cells and with ApoB in mammalian  
502 cell lines (Lerner et al., 2013; Santos et al., 2016). Proteomic studies have shown an  
503 indirect interaction between Dpy and Sec16, supporting a COPII-mediated transport  
504 of Dpy (Rees et al., 2011).

505 No regions of sequence similarity that could represent Tango1 binding sites have  
506 been found in Tango1 cargos. There are several possible explanations for this. First,  
507 these proteins may contain binding motifs, but the motifs are purely conformational  
508 and not represented in a linear amino acid sequence. There is no evidence for or  
509 against this hypothesis, but it would be highly unusual, and there is support for  
510 alternative explanations. Thus, as a second possibility, all three proteins may require  
511 Tango1 for their secretion, but variable adapters could mediate the interactions. In  
512 vertebrates, Tango1 can indeed interact with its cargo through other molecules; for  
513 instance, its interaction with collagen is mediated by Hsp47 (Ishikawa et al., 2016).  
514 However, in *Drosophila* there is no Hsp47 homolog (Martinek et al., 2008). In the  
515 case of ApoB, it has been suggested that microsomal triglyceride transfer protein  
516 (MTP) and its binding partner, protein disulphide isomerase (PDI), might associate  
517 with Tango1 and TALI to promote ApoB chylomicrons loading into COPII vesicles.  
518 Evidence supporting this is that the lack of MTP leads to ApoB accumulation at the  
519 ER (Pfeffer, 2016; Santos et al., 2016). It is not known if secretion of other Tango1  
520 cargos like collagen or Dpy also depends on MTP and PDI, but PDI is known also to  
521 form a complex with the collagen-modifying enzyme prolyl 4-hydroxylase (Kivirikko  
522 and Myllyharju, 1998). We have previously shown that terminal cells lacking MTP

523 show air-filling defects and fail to secrete Pio and Uninflatable to the apical  
524 membrane, and that loss of MTP in fat body cells also affects lipoprotein secretion  
525 (Baer et al., 2012), as it does in vertebrates. Since cells lacking MTP or Tango1 have  
526 similar phenotypes, it is plausible that the MTP function might be connected to the  
527 activity of Tango1.

528

### 529 **Clogging of the ER**

530 We interpret our data to mean that in the absence of Tango1, primary cargo  
531 accumulates in the ER, and in addition, there are secondary, indirect effects that can  
532 be suppressed by reducing the Tango1 cargo that overloads the ER. The secondary  
533 effects include activation of the ER stress response and intracellular accumulation of  
534 other trafficked proteins like Crb, laminins, and overexpressed proteins and probably  
535 also the accumulation of heterologous proteins like secreted HRP or GFP in other  
536 systems (Nogueira et al., 2014).

537

538 We can think of two explanations for how accumulation of Tango1 cargo might affect  
539 the secretion of other proteins. Primary cargo accumulating in the ER could be  
540 inhibiting the secretion of other proteins by blocking access of all proteins in the ER  
541 to ERES. However, we find this unlikely given that  $\beta$ PS integrin can still be secreted  
542 towards the plasma membrane in these cells. An alternative explanation may be an  
543 involvement of the ER stress response. While the ER stress response does not seem  
544 to be a direct consequence of loss of Tango1 since it can be suppressed by  
545 removing ER overload, the activation of the ER stress response might nevertheless  
546 actively affect the secretion of certain proteins from the ER to the Golgi apparatus.

547

### 548 **Different sensitivities of $\beta$ PS integrin and Crb to loss of Tango1**

549 It is not immediately clear why cargo accumulation in terminal cells lacking Tango1  
550 affects the secretion of Crb but not of  $\beta$ PS integrin. While we look at steady states in  
551 our analyses, Maeda et al. have measured the dynamics of secretion and find that  
552 loss of Tango1 leads to a reduced rate of secretion of VSVG-GFP, an effect that we  
553 would have missed for any proteins we classify as not affected by loss of Tango1  
554 (Maeda et al., 2017). Irrespective, we can think of a range of mechanisms that might  
555 be responsible for this difference, including alternative secretion pathways and  
556 differences in protein recycling. Alternative independent secretory pathways have  
557 been reported in different contexts. For instance, while both  $\alpha$ PS1 and  $\beta$ PS integrin  
558 chains depend on Sec16 for their transport, the  $\alpha$ PS1 chain can bypass the Golgi  
559 apparatus and can instead use the dGRASP-dependent pathway for its transport



560 (Schotman et al., 2008). It would be possible then that in terminal cells,  $\beta$ PS integrin  
561 is also trafficked through an alternative pathway that is not affected by loss of  
562 Tango1. Similarly, tracheal cells lacking Sec24-CD (encoded by the gene *gho*)  
563 accumulate Gasp, Vermiform and Fasciclin III, but not Crb (Norum et al., 2010),  
564 supporting a role for alternative secretion pathways for different proteins, as already  
565 proposed by Nogueira et al. (Nogueira et al., 2014). Following this logic,  
566 overexpressed  $\beta$ PS integrin would then also be trafficked through a different route  
567 from that of the endogenous  $\beta$ PS integrin, possibly because of higher expression  
568 levels or because of the presence of the Venus fused to the normal protein. Another  
569 reason for the sensitivity of Crb to loss of Tango1 may be that it is intensively  
570 recycled from the plasma membrane in tracheal cells and other tissues (Roeth et al.,  
571 2009; Schottenfeld-Roames et al., 2014; Sollier et al., 2015). We may therefore be  
572 seeing recycling Crb being trapped as a secondary consequence of the defects in the  
573 ER and Golgi system, whereas  $\beta$ PS integrin might remain in the plasma membrane  
574 once it has reached the cell surface, and therefore be able to gradually assembly  
575 there to near-normal levels even when it is partly blocked in its transit.

576

577 **Other secondary Tango1 cargos in fat body: interdependence of**  
578 **extracellular matrix proteins.**

579 *Drosophila* Tango1 was initially found to facilitate collagen secretion in the fat body.  
580 More recently, the accumulation of other non-bulky proteins at the ER in the absence  
581 of Tango1 has led to the proposal of two models to explain these results: One in  
582 which Tango1 regulates general secretion (Liu et al., 2017), and the second one  
583 where Tango1 is specialized on the secretion of ECM components (Liu et al., 2017;  
584 Tiwari et al., 2015), since loss of Tango1 leads to the accumulation of the ECM  
585 molecules SPARC and collagen (Tiwari et al., 2015). Our results suggest a third  
586 explanation, where cargo accumulation in the ER might not necessarily be a direct  
587 consequence of only the loss of Tango1. Instead, in addition to depending on  
588 Tango1, some proteins of the ECM appear also to depend on each other for their  
589 efficient secretion. This is the case for laminins LanB1 and LanB2, which require  
590 trimerization prior to exiting the ER, while LanA can be secreted as a monomer,  
591 (Hamill et al., 2009). Loss of collagen itself leads to the intracellular accumulation of  
592 ECM components in fat body cells, such as the laminins and SPARC. Conversely,  
593 SPARC is required for proper collagen and laminin secretion and assembly in the  
594 ECM (Martinek et al., 2008; Pastor-Pareja and Xu, 2011; Shahab et al., 2015).  
595 Furthermore, intricate biochemical interactions take place between ECM components  
596 (Kramer, 2005). Hence, due to the complex genetic and biochemical interactions

597 between ECM components, the dependence of any one of them on Tango1 is difficult  
598 to determine without further biochemical evidence. The concept of interdependent  
599 protein transport from the ER as such is not new, as it has also been observed in  
600 other systems, for instance in immune complexes. During the assembly of T-cell  
601 receptor complexes and of IgM antibodies, subunits that are not assembled are  
602 retained in the ER and degraded (Call and Wucherpfennig, 2004; Geva and  
603 Schuldiner, 2014).

604 Nevertheless, our observations in glial cells, which express laminins but not collagen,  
605 allow us to at least partly separate these requirements. We find that laminins are  
606 accumulated due to general ER clogging and not because they rely on Tango1 for  
607 their export. This is based on our observations that once the protein causing the ER  
608 block is removed, laminin secretion can continue in the absence of Tango1. It is still  
609 unclear why glial cells can secrete laminins in the absence of collagen whereas fat  
610 body cells cannot, but presumably laminin secretion can be mediated by different,  
611 unidentified cargo receptors expressed in glial cells.

612

### 613 **A direct role for Tango1 in ER-Golgi organization**

614 We found that Sec16 forms aberrant aggregates in cells lacking Tango1, as in  
615 mammalian cell lines (Saito et al., 2009), and that the number of Sec16 particles is  
616 reduced. Other studies have shown that Tango1 overexpression produces larger  
617 ERES (Liu et al., 2017), and that Tango1 and Sec16 depend on each other for  
618 localization to ERES (Maeda et al., 2017). In addition, as shown here and by others,  
619 lack of Tango1 also affects the distribution of Golgi markers (Bard et al., 2006; Liu et  
620 al., 2017; Santos et al., 2015). Thus Tango1 influences not only the trafficking of  
621 cargos, but also the morphology of the secretory system.

622 It had been suggested that the disorganization of ER and Golgi in cells lacking  
623 Tango1 might be an indirect consequence of the accumulation of Tango1 cargo  
624 (Saito et al., 2009). The work of Maeda et al. has provided a possible explanation for  
625 the molecular basis, and proposed that Tango1 makes general secretion more  
626 efficient, but it has not formally excluded the possibility that the primary cause for the  
627 observed defects is secretory protein overload. We have now shown that this is not  
628 the case: in the absence of Tango1 we still observe an aberrant ER and Golgi  
629 morphology even after we have removed the main primary substrates of Tango1 and  
630 thereby restored secretion of other molecules and prevented the ER stress response.  
631 The finding that Tango1-depleted cells have a functional secretory pathway in spite  
632 of the ER-Golgi disorganization was unexpected. Stress stimuli like amino acid  
633 starvation (but not ER stress response itself) lead to Sec16 translocation into Sec

634 bodies and inhibition of protein secretion (Zacharogianni et al., 2014). However,  
635 uncoupling of ER-Golgi organization from functional secretion has also been  
636 observed in other contexts. Loss of Sec23 or Sec24-CD leads to KDEL appearing in  
637 aggregates of varying sizes and intensities similar to those we observe for Sec16 and  
638 for KDEL-RFP in cells lacking *tango1* (Norum et al., 2010). Also GM130 is reduced in  
639 Sec23 mutant embryos. However, these embryos do not show generalized secretion  
640 defects and also do not affect the functionality of the Golgi apparatus, as determined  
641 by glycosylation status of membrane proteins (Norum et al., 2010).  
642 Thus, Tango1 appears to have an important structural function in coordinating the  
643 organization of the ER and the Golgi apparatus, and this in turn may enhance vesicle  
644 trafficking. This fits with the role of Tango1 in recruiting ERGIC membranes to the  
645 ERES (Santos et al., 2015), and also with the effects of loss of Tango1 in the  
646 distribution of ER and Golgi markers (as shown here and by others). Lavieu et al.  
647 have proposed that the ER and Golgi in insects, which unlike in mammalian cells is  
648 not centralized but spread throughout the cytoplasm, is less efficient for secretion of  
649 bulky cargo than mammalian cells that can accommodate and transport it more  
650 efficiently through the Golgi ribbon (Lavieu et al., 2014). This difference could explain  
651 why *tango1* knockout mice seem to have only collagen secretion defects and die only  
652 as neonates (Wilson et al., 2011). However, a complete blockage of the ER might  
653 also be prevented by the activity of other MIA3/cTAGE5 family homologs in mice. In  
654 mammalian cell culture experiments, even if loss of *tango1* affects secretion of HRP,  
655 the secretion of other overexpressed molecules like alkaline phosphatase is not  
656 affected. This could also be because of the presence of other MIA3/cTAGE5 family  
657 homologs. By contrast, because there are no other MIA3/cTAGE5 family proteins in  
658 *Drosophila*, loss of *tango1* may lead to the accumulation of a wider range of  
659 overexpressed proteins and more overt mutant phenotypes than in mammals.

660

## 661 **Acknowledgements**

662 We thank S. Kraus for technical assistance, N. Jayanandanan for guidance in the  
663 early part of this work and S. De Renzis, P. Domingos, D. Gilmour, K. Roeper and  
664 members of the Leptin lab for helpful discussions. We are grateful to the Vienna  
665 *Drosophila* Resource Center, the Bloomington *Drosophila* Stock Center, the National  
666 Institute of Genetics Fly Stock Center, the Kyoto *Drosophila* Genetic Resource  
667 Center, the *Drosophila* Genomics Resource Center, and our colleagues M. Affolter,  
668 P. Domingos, S. Horne-Badovinac, C. Klämbt, E. Knust, S. Luschnig, C. Rabouille,  
669 C. Samakovlis, F. Schnorrer, G. Tanentzapf and B. Thompson for stocks and  
670 reagents. We thank the EMBL Advanced Light Microscopy Facility (ALMF) for

671 continuous support and Zeiss for the support of the ALMF. We thank P. Bun for his  
672 support on image analysis pipelines. FlyBase was used throughout this work and is  
673 greatly appreciated.

674 The work was supported through funding from EMBO, EMBL, DFG grant LE 546/7-1  
675 and the NRW Graduate School for Genetics and Functional Genomics. LDRB was  
676 funded by the EMBL Interdisciplinary Postdoctoral Programme under Marie Curie  
677 Actions.

678 Author contributions: MB identified and mapped the 2L3443 mutation. SS generated  
679 the UAS-Tango1-GFP, and UAS- $\beta$ PS-Integrin-Venus lines. Experiments were  
680 designed by LDRB, SS and ML, and performed by LDRB and SS. LDRB and ML  
681 wrote the paper. All authors have read and edited the manuscript.

682

683

## 684 **References**

685 Baer, M.M., A. Bilstein, and M. Leptin. 2007. A clonal genetic screen for mutants  
686 causing defects in larval tracheal morphogenesis in *Drosophila*. *Genetics*.  
687 176:2279-2291.

688 Baer, M.M., W. Palm, S. Eaton, M. Leptin, and M. Affolter. 2012. Microsomal  
689 triacylglycerol transfer protein (MTP) is required to expand tracheal lumen in  
690 *Drosophila* in a cell-autonomous manner. *J Cell Sci*. 125:6038-6048.

691 Bard, F., L. Casano, A. Mallabiabarrena, E. Wallace, K. Saito, H. Kitayama, G.  
692 Guizzunti, Y. Hu, F. Wendler, R. Dasgupta, N. Perrimon, and V. Malhotra.  
693 2006. Functional genomics reveals genes involved in protein secretion and  
694 Golgi organization. *Nature*. 439:604-607.

695 Berger, J., T. Suzuki, K.A. Senti, J. Stubbs, G. Schaffner, and B.J. Dickson. 2001.  
696 Genetic mapping with SNP markers in *Drosophila*. *Nat Genet*. 29:475-481.

697 Call, M.E., and K.W. Wucherpfennig. 2004. Molecular mechanisms for the assembly  
698 of the T cell receptor-CD3 complex. *Mol Immunol*. 40:1295-1305.

699 Coelho, D.S., F. Cairrao, X.M. Zeng, E. Pires, A.V. Coelho, D. Ron, H.D. Ryoo, and  
700 P.M. Domingos. 2013. Xbp1-Independent Ire1 Signaling Is Required for  
701 Photoreceptor Differentiation and Rhabdomere Morphogenesis in *Drosophila*.  
702 *Cell Reports*. 5:791-801.

703 Geva, Y., and M. Schuldiner. 2014. The back and forth of cargo exit from the  
704 endoplasmic reticulum. *Curr Biol*. 24:R130-136.

- 705 Guillemin, K., T. Williams, and M.A. Krasnow. 2001. A nuclear lamin is required for  
706 cytoplasmic organization and egg polarity in *Drosophila*. *Nature Cell Biology*.  
707 3:848-851.
- 708 Hamill, K.J., K. Kligys, S.B. Hopkinson, and J.C. Jones. 2009. Laminin deposition in  
709 the extracellular matrix: a complex picture emerges. *J Cell Sci*. 122:4409-  
710 4417.
- 711 Ishikawa, Y., S. Ito, K. Nagata, L.Y. Sakai, and H.P. Bachinger. 2016. Intracellular  
712 mechanisms of molecular recognition and sorting for transport of large  
713 extracellular matrix molecules. *Proc Natl Acad Sci U S A*. 113:E6036-E6044.
- 714 Jazwinska, A., C. Ribeiro, and M. Affolter. 2003. Epithelial tube morphogenesis  
715 during *Drosophila* tracheal development requires Piopio, a luminal ZP protein.  
716 *Nat Cell Biol*. 5:895-901.
- 717 Kivirikko, K.I., and J. Myllyharju. 1998. Prolyl 4-hydroxylases and their protein  
718 disulfide isomerase subunit. *Matrix Biology*. 16:357-368.
- 719 Knowles-Barley, S., M. Longair, and J.D. Armstrong. 2010. BrainTrap: a database of  
720 3D protein expression patterns in the *Drosophila* brain. *Database (Oxford)*.  
721 2010:baq005.
- 722 Kramer, J. 2005. Basement membranes. *In Wormbook*. T.C.e.R. Community, editor.
- 723 Lavieu, G., M.H. Dunlop, A. Lerich, H. Zheng, F. Bottanelli, and J.E. Rothman. 2014.  
724 The Golgi ribbon structure facilitates anterograde transport of large cargoes.  
725 *Mol Biol Cell*. 25:3028-3036.
- 726 Lerner, D.W., D. McCoy, A.J. Isabella, A.P. Mahowald, G.F. Gerlach, T.A. Chaudhry,  
727 and S. Horne-Badovinac. 2013. A Rab10-dependent mechanism for polarized  
728 basement membrane secretion during organ morphogenesis. *Dev Cell*.  
729 24:159-168.
- 730 Liu, M., Z. Feng, H. Ke, Y. Liu, T. Sun, J. Dai, W. Cui, and J.C. Pastor-Pareja. 2017.  
731 Tango1 spatially organizes ER exit sites to control ER export. *J Cell Biol*.
- 732 Maeda, M., T. Katada, and K. Saito. 2017. TANGO1 recruits Sec16 to coordinately  
733 organize ER exit sites for efficient secretion. *J Cell Biol*.
- 734 Martinek, N., J. Shahab, M. Saathoff, and M. Ringuette. 2008. Haemocyte-derived  
735 SPARC is required for collagen-IV-dependent stability of basal laminae in  
736 *Drosophila* embryos. *J Cell Sci*. 121:1671-1680.
- 737 Misra, S., M.A. Crosby, C.J. Mungall, B.B. Matthews, K.S. Campbell, P. Hradecky, Y.  
738 Huang, J.S. Kaminker, G.H. Millburn, S.E. Prochnik, C.D. Smith, J.L. Tupy,  
739 E.J. Whitfield, L. Bayraktaroglu, B.P. Berman, B.R. Bettencourt, S.E. Celniker,  
740 A.D. de Grey, R.A. Drysdale, N.L. Harris, J. Richter, S. Russo, A.J.  
741 Schroeder, S.Q. Shu, M. Stapleton, C. Yamada, M. Ashburner, W.M. Gelbart,

- 742 G.M. Rubin, and S.E. Lewis. 2002. Annotation of the *Drosophila*  
743 *melanogaster* euchromatic genome: a systematic review. *Genome Biol.*  
744 3:RESEARCH0083.
- 745 Morin, X., R. Daneman, M. Zavortink, and W. Chia. 2001. A protein trap strategy to  
746 detect GFP-tagged proteins expressed from their endogenous loci in  
747 *Drosophila*. *Proceedings of the National Academy of Sciences of the United*  
748 *States of America*. 98:15050-15055.
- 749 Nogueira, C., P. Erlmann, J. Villeneuve, A.J. Santos, E. Martinez-Alonso, J.A.  
750 Martinez-Menarguez, and V. Malhotra. 2014. SLY1 and Syntaxin 18 specify a  
751 distinct pathway for procollagen VII export from the endoplasmic reticulum.  
752 *Elife*. 3:e02784.
- 753 Norum, M., E. Tang, T. Chavoshi, H. Schwarz, D. Linke, A. Uv, and B. Moussian.  
754 2010. Trafficking through COPII Stabilises Cell Polarity and Drives Secretion  
755 during *Drosophila* Epidermal Differentiation. *Plos One*. 5.
- 756 Ozturk-Colak, A., B. Moussian, and S.J. Araujo. 2016. *Drosophila* chitinous aECM  
757 and its cellular interactions during tracheal development. *Dev Dyn*. 245:259-  
758 267.
- 759 Palm, W., J.L. Sampaio, M. Brankatschk, M. Carvalho, A. Mahmoud, A. Shevchenko,  
760 and S. Eaton. 2012. Lipoproteins in *Drosophila melanogaster*--assembly,  
761 function, and influence on tissue lipid composition. *PLoS Genet*. 8:e1002828.
- 762 Pastor-Pareja, J.C., and T. Xu. 2011. Shaping cells and organs in *Drosophila* by  
763 opposing roles of fat body-secreted Collagen IV and perlecan. *Dev Cell*.  
764 21:245-256.
- 765 Pellikka, M., G. Tanentzapf, M. Pinto, C. Smith, C.J. McGlade, D.F. Ready, and U.  
766 Tepass. 2002. Crumbs, the *Drosophila* homologue of human CRB1/RP12, is  
767 essential for photoreceptor morphogenesis. *Nature*. 416:143-149.
- 768 Petley-Ragan, L.M., E.L. Ardiel, C.H. Rankin, and V.J. Auld. 2016. Accumulation of  
769 Laminin Monomers in *Drosophila* Glia Leads to Glial Endoplasmic Reticulum  
770 Stress and Disrupted Larval Locomotion. *J Neurosci*. 36:1151-1164.
- 771 Pfeffer, S.R. 2016. Lipoprotein secretion: It takes two to TANGO. *J Cell Biol*.  
772 213:297-299.
- 773 Raote, I., M. Ortega Bellido, M. Pirozzi, C. Zhang, D. Melville, S. Parashuraman, T.  
774 Zimmermann, and V. Malhotra. 2017. TANGO1 assembles into rings around  
775 COPII coats at ER exit sites. *J Cell Biol*.
- 776 Ray, R.P., A. Matamoro-Vidal, P.S. Ribeiro, N. Tapon, D. Houle, I. Salazar-Ciudad,  
777 and B.J. Thompson. 2015. Patterned Anchorage to the Apical Extracellular

- 778 Matrix Defines Tissue Shape in the Developing Appendages of *Drosophila*.  
779 *Dev Cell*. 34:310-322.
- 780 Rees, J.S., N. Lowe, I.M. Armean, J. Roote, G. Johnson, E. Drummond, H. Spriggs,  
781 E. Ryder, S. Russell, D. St Johnston, and K.S. Lilley. 2011. In Vivo Analysis  
782 of Proteomes and Interactomes Using Parallel Affinity Capture (iPAC)  
783 Coupled to Mass Spectrometry. *Molecular & Cellular Proteomics*. 10.
- 784 Roeth, J.F., J.K. Sawyer, D.A. Wilner, and M. Peifer. 2009. Rab11 helps maintain  
785 apical crumbs and adherens junctions in the *Drosophila* embryonic ectoderm.  
786 *PLoS One*. 4:e7634.
- 787 Ryoo, H.D., P.M. Domingos, M.J. Kang, and H. Steller. 2007. Unfolded protein  
788 response in a *Drosophila* model for retinal degeneration. *EMBO J*. 26:242-  
789 252.
- 790 Saito, K., M. Chen, F. Bard, S. Chen, H. Zhou, D. Woodley, R. Polischuk, R.  
791 Schekman, and V. Malhotra. 2009. TANGO1 facilitates cargo loading at  
792 endoplasmic reticulum exit sites. *Cell*. 136:891-902.
- 793 Santos, A.J., C. Nogueira, M. Ortega-Bellido, and V. Malhotra. 2016. TANGO1 and  
794 Mia2/cTAGE5 (TALI) cooperate to export bulky pre-chylomicrons/VLDLs from  
795 the endoplasmic reticulum. *J Cell Biol*. 213:343-354.
- 796 Santos, A.J., I. Raote, M. Scarpa, N. Brouwers, and V. Malhotra. 2015. TANGO1  
797 recruits ERGIC membranes to the endoplasmic reticulum for procollagen  
798 export. *Elife*. 4.
- 799 Sarov, M., C. Barz, H. Jambor, M.Y. Hein, C. Schmied, D. Suchold, B. Stender, S.  
800 Janosch, J.V. K, R.T. Krishnan, A. Krishnamoorthy, I.R. Ferreira, R.K.  
801 Ejsmont, K. Finkl, S. Hasse, P. Kampfer, N. Plewka, E. Vinis, S. Schloissnig,  
802 E. Knust, V. Hartenstein, M. Mann, M. Ramaswami, K. VijayRaghavan, P.  
803 Tomancak, and F. Schnorrer. 2016. A genome-wide resource for the analysis  
804 of protein localisation in *Drosophila*. *Elife*. 5:e12068.
- 805 Schindelin, J., I. Arganda-Carreras, E. Frise, V. Kaynig, M. Longair, T. Pietzsch, S.  
806 Preibisch, C. Rueden, S. Saalfeld, B. Schmid, J.Y. Tinevez, D.J. White, V.  
807 Hartenstein, K. Eliceiri, P. Tomancak, and A. Cardona. 2012. Fiji: an open-  
808 source platform for biological-image analysis. *Nat Methods*. 9:676-682.
- 809 Schotman, H., L. Karhinen, and C. Rabouille. 2008. dGRASP-mediated noncanonical  
810 integrin secretion is required for *Drosophila* epithelial remodeling. *Dev Cell*.  
811 14:171-182.
- 812 Schottenfeld-Roames, J., J.B. Rosa, and A.S. Ghabrial. 2014. Seamless tube shape  
813 is constrained by endocytosis-dependent regulation of active Moesin. *Curr*  
814 *Biol*. 24:1756-1764.

- 815 Shahab, J., C. Baratta, B. Scuric, D. Godt, K.J. Venken, and M.J. Ringuette. 2015.  
816 Loss of SPARC dysregulates basal lamina assembly to disrupt larval fat body  
817 homeostasis in *Drosophila melanogaster*. *Dev Dyn.* 244:540-552.
- 818 Sollier, K., H.M. Gaude, F.J. Chartier, and P. Laprise. 2015. Rac1 controls epithelial  
819 tube length through the apical secretion and polarity pathways. *Biol Open.*  
820 5:49-54.
- 821 Szul, T., and E. Sztul. 2011. COPII and COPI traffic at the ER-Golgi interface.  
822 *Physiology (Bethesda).* 26:348-364.
- 823 Tiklova, K., V. Tsarouhas, and C. Samakovlis. 2013. Control of airway tube diameter  
824 and integrity by secreted chitin-binding proteins in *Drosophila*. *PLoS One.*  
825 8:e67415.
- 826 Tiwari, P., A. Kumar, R.N. Das, V. Malhotra, and K. VijayRaghavan. 2015. A Tendon  
827 Cell Specific RNAi Screen Reveals Novel Candidates Essential for Muscle  
828 Tendon Interaction. *PLoS One.* 10:e0140976.
- 829 Tsarouhas, V., K.A. Senti, S.A. Jayaram, K. Tiklova, J. Hemphala, J. Adler, and C.  
830 Samakovlis. 2007. Sequential pulses of apical epithelial secretion and  
831 endocytosis drive airway maturation in *Drosophila*. *Dev Cell.* 13:214-225.
- 832 Vincent, S., R. Wilson, C. Coelho, M. Affolter, and M. Leptin. 1998. The *Drosophila*  
833 Protein Dof Is Specifically Required for FGF Signaling. *Molecular Cell.* 2:515-  
834 525.
- 835 Wilkin, M.B., M.N. Becker, D. Mulvey, I. Phan, A. Chao, K. Cooper, H.J. Chung, I.D.  
836 Campbell, M. Baron, and R. MacIntyre. 2000. *Drosophila* Dumpy is a gigantic  
837 extracellular protein required to maintain tension at epidermal-cuticle  
838 attachment sites. *Current Biology.* 10:559-567.
- 839 Wilson, D.G., K. Phamluong, L. Li, M. Sun, T.C. Cao, P.S. Liu, Z. Modrusan, W.N.  
840 Sandoval, L. Rangell, R.A. Carano, A.S. Peterson, and M.J. Solloway. 2011.  
841 Global defects in collagen secretion in a Mia3/TANGO1 knockout mouse. *J*  
842 *Cell Biol.* 193:935-951.
- 843 Yuan, L., M.J. Fairchild, A.D. Perkins, and G. Tanentzapf. 2010. Analysis of integrin  
844 turnover in fly myotendinous junctions. *J Cell Sci.* 123:939-946.
- 845 Zacharogianni, M., A. Aguilera-Gomez, T. Veenendaal, J. Smout, and C. Rabouille.  
846 2014. A stress assembly that confers cell viability by preserving ERES  
847 components during amino-acid starvation. *Elife.* 3.
- 848 Zhai, B., J. Villen, S.A. Beausoleil, J. Mintseris, and S.P. Gygi. 2008.  
849 Phosphoproteome analysis of *Drosophila melanogaster* embryos. *J Proteome*  
850 *Res.* 7:1675-1682.
- 851



## Figure 1. Effect of loss of Tango1 on cell, ER and Golgi morphology

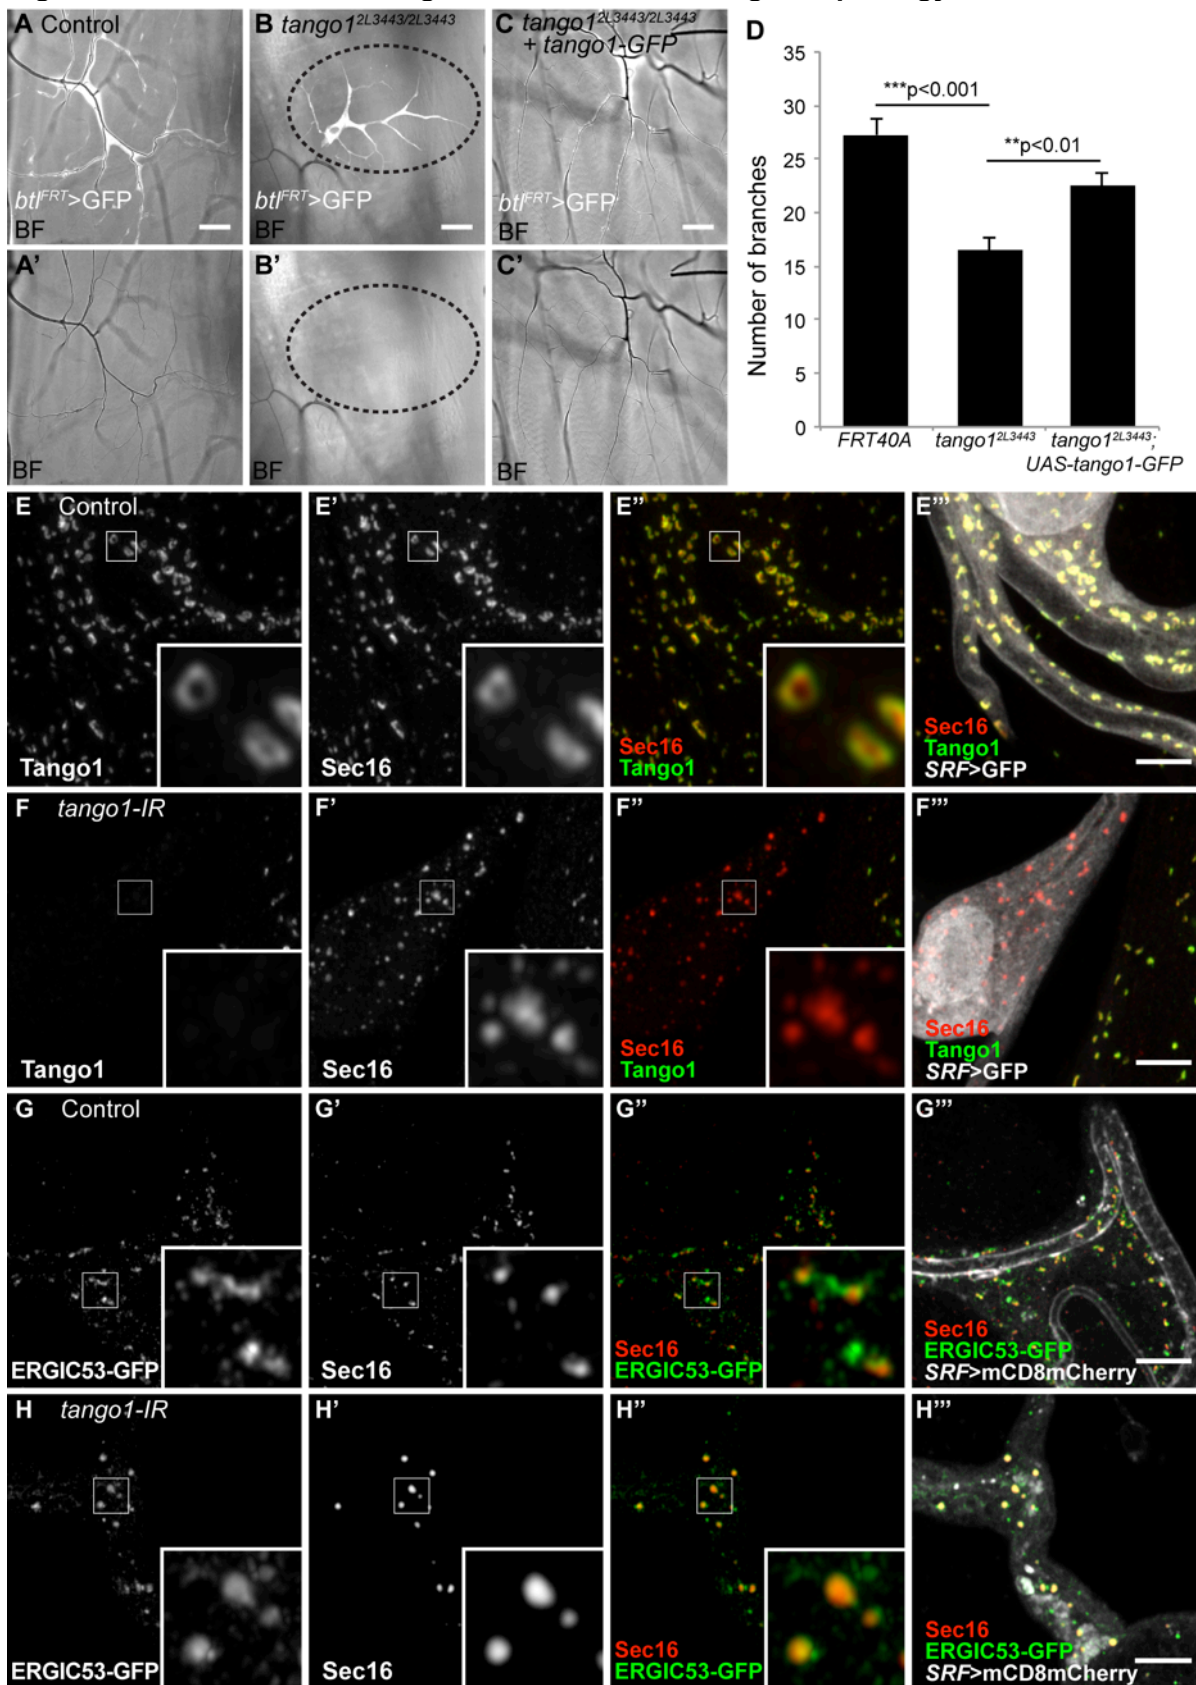

(A-C) Bright field (BF) images of homozygous *tango1*<sup>2L3443</sup> mutant tracheal cells expressing GFP (*btl*<sup>FRT</sup>>GFP) allow the visualization of number of branches and the presence of air in terminal cells. Unlike control cells (A), homozygous *tango1*<sup>2L3443</sup> cells are not air-filled (area surrounded by dotted line in B). (C) Expression of Tango1-GFP in mutant cells suppresses the air-filling defects and re-establishes near-normal number of branches (D). Control, n=11; *tango1*<sup>2L3443</sup>, n=14; *tango1*<sup>2L3443</sup>+Tango1-GFP, n=11. Bars represent mean +/-SEM. Significance was determined using two-tailed t-test. (E-H) Airyscan microscopy images of control (E, G) and *tango1* knockdown cells (F, H), stained for Sec16 and Tango1 (E, F) and for ERGIC53-GFP (fTRG library, expressed at endogenous levels) and Tango1. Scale bars are 40µm (A-C) and 5µm (E-H).

**Figure 2. Function of cargo proteins and their distribution upon loss of Tango1.**

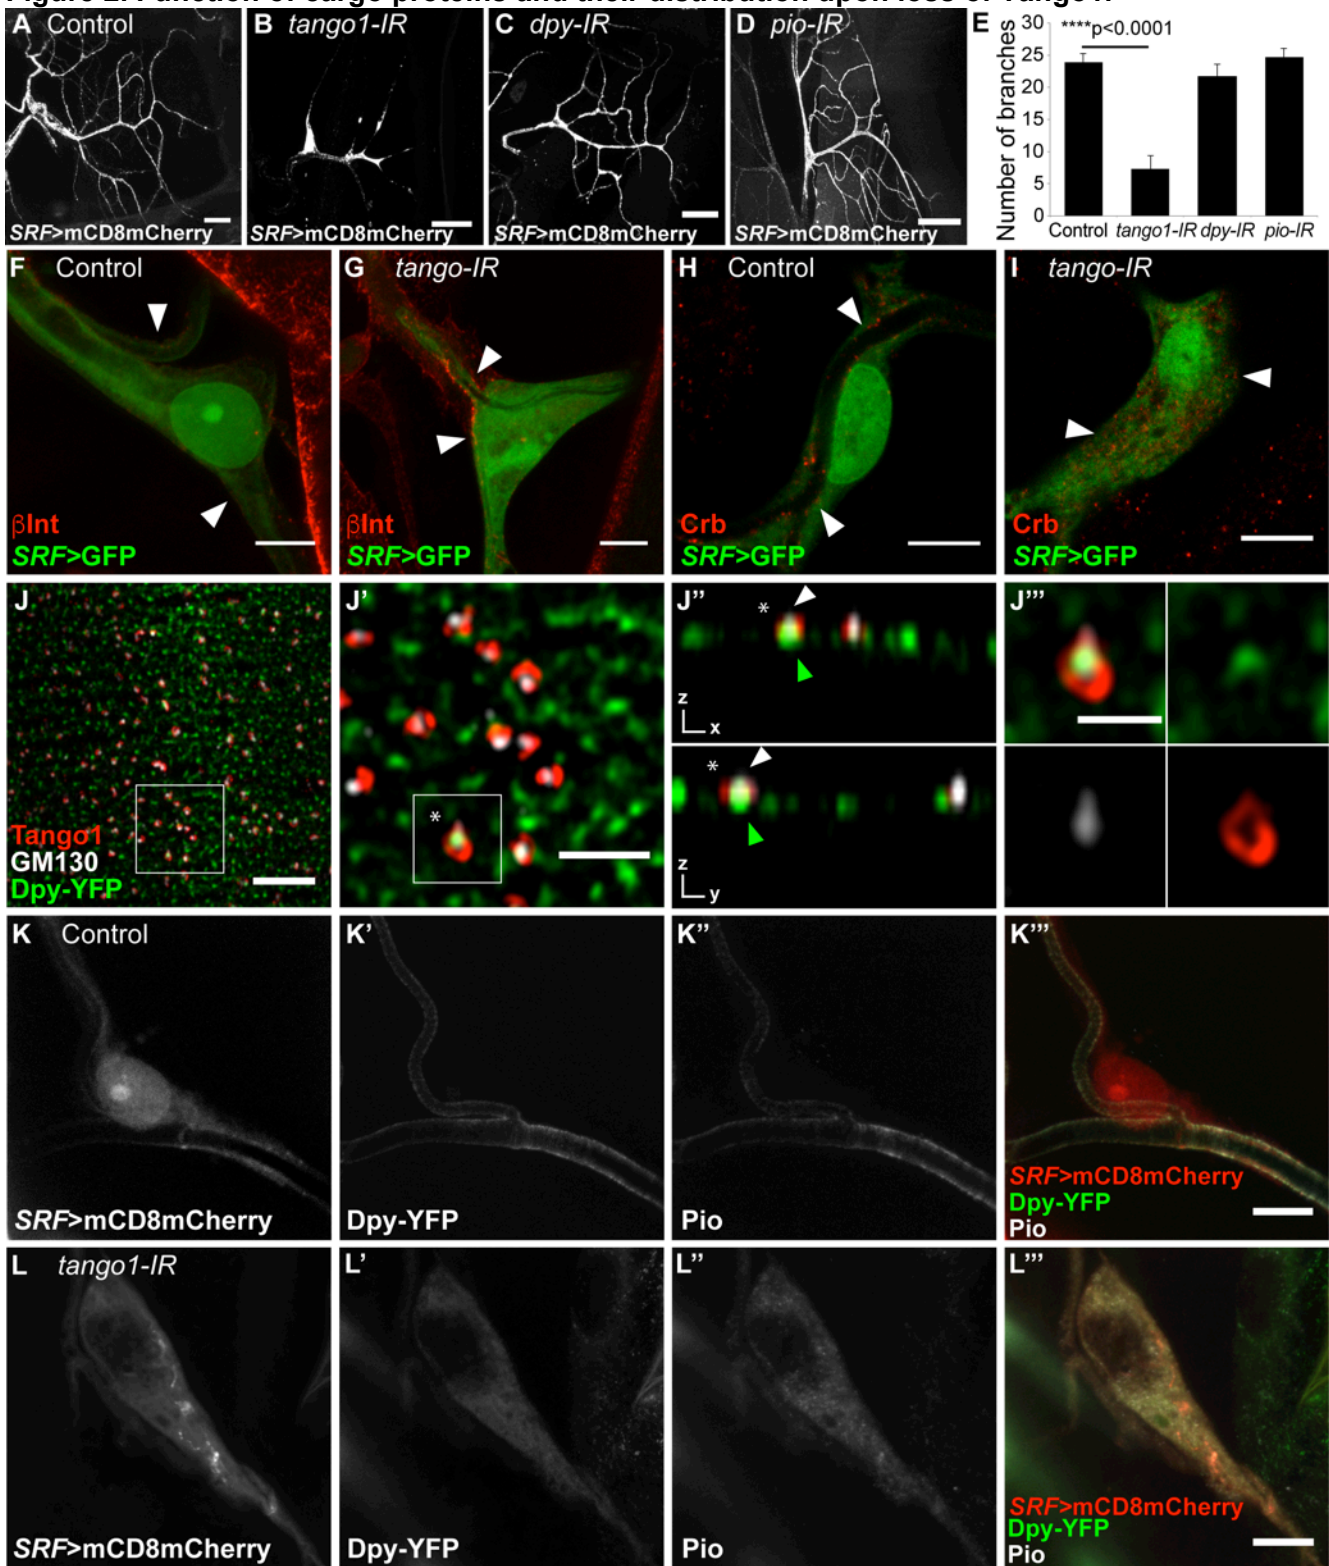

(A-E) Terminal cells were visualized by expressing mCD8mCherry under the terminal-specific driver *SRF-gal4*. (E) Manual quantification of branch numbers in terminal cells expressing different RNAi; cells expressing *tango1* RNAi (B) have fewer branches than control cells (A). Neither *dpy* RNAi (C) nor *p10* RNAi (D) affect branch numbers. Control, n=8; *tango1-IR*, n=9; *dpy-IR*, n=8; *p10-IR*, n=9. Bars represent mean ± SEM. Significance was determined using two-tailed t-test. (F, G) Confocal projections of control (F) and *tango1-IR* (G) terminal cells expressing *SRF>GFP* and stained for βPS integrin (βInt). Arrowheads point to βInt localization. (H, I) Confocal projections of control (H) and *tango1-IR* (I) terminal cells expressing *SRF>GFP* and stained for Crb. Arrowheads point to Crb localization. (J) Airyscan images of details of tracheal dorsal trunk cells expressing Dpy-YFP and stained for Tango1 and Golgi marker GM130. White squares indicate the magnified regions. (J'') orthogonal views of a single plane from (J'). (K, L) Confocal projections of control (K) and *tango1-IR* (L) terminal cells expressing *SRF>mCD8mCherry* and Dpy-YFP and stained for Pio. Scale bars are 40μm (A-D), 10μm (F-I, K-L), 5μm (J), 2μm (J') and 1μm (J''').

**Figure 3. Cargo accumulation and ER defects in wing disc, glial and tendon cells.**

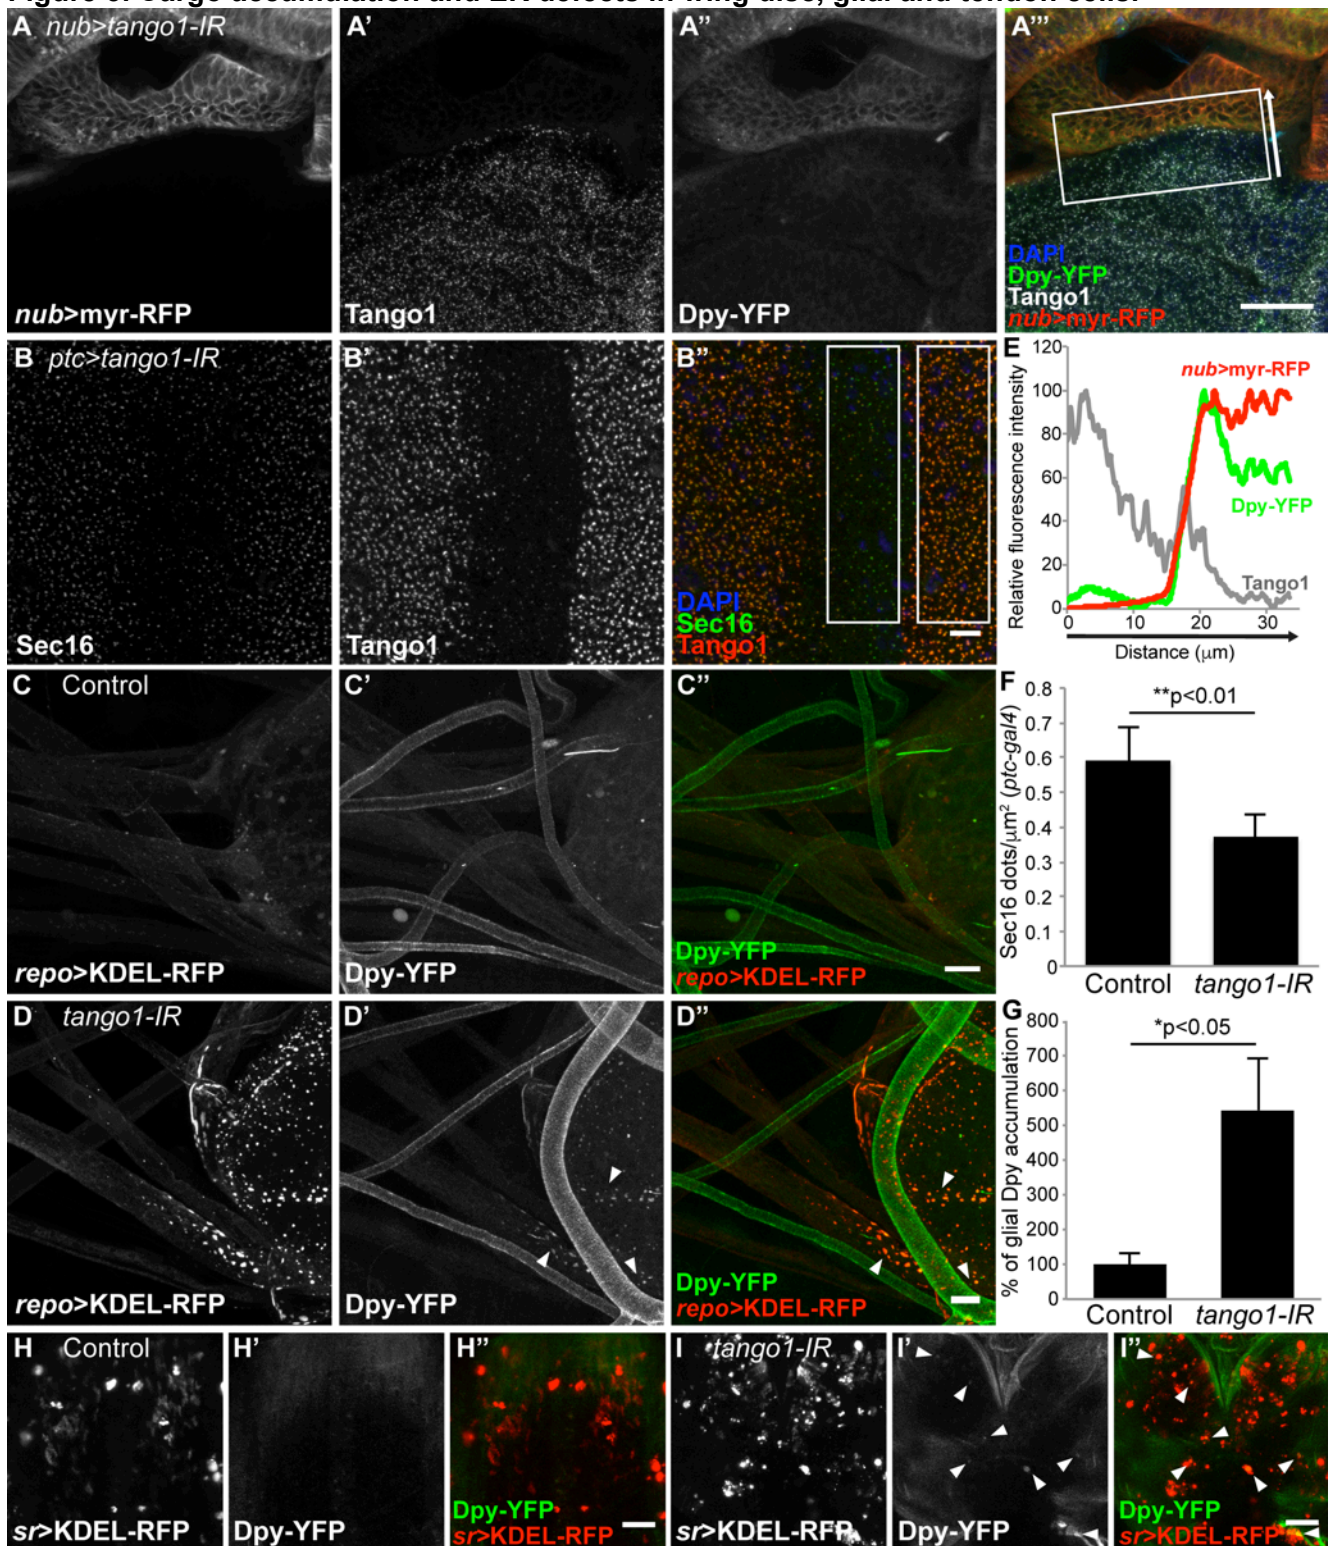

(A) Wing disc from animals with an endogenously tagged Dpy protein (Dpy-YFP) expressing myr-RFP and *tango1-IR* in the wing pouch under *nub-gal4*. Tango1 was stained to confirm the efficiency of knockdown. (B) Wing disc expressing *tango1-IR* under the *ptc-gal4* driver and stained for Sec16. Absence of Tango1 staining reveals the region where *tango1-IR* is expressed. (C, D) Larval brains expressing KDEL-RFP as an ER marker under the glial-specific driver *repo-gal4*. Arrowheads in (D) show sites of Dpy accumulation, and their quantification is shown in (G). (E) Intensity profile in the direction of the white arrow and summed across the width of the box in (A). (F) The number of Sec16 dots (+/- SD) in the boxed regions in (B''). Number of discs analyzed = 4. Significance was determined using two-tailed t-test. (G) Quantification of the level of Dpy-YFP (+/- SD) retained within the *repo>KDEL-RFP* channel. Control, n=4; *tango1-IR*, n=4. Significance was determined using two-tailed t-test. (H, I) Live pupae expressing KDEL-RFP under the tendon cell driver *sr-gal4*, and endogenous Dpy-YFP expression. Arrowheads in (I) point to sites of Dpy accumulation. Scale bars are 25μm (A), 5μm (B), 10μm (C, D), and 50μm (H, I).

**Figure 4. Effect of loss of *tango1* in the fat body on  $\beta$ PS integrin and collagen .**

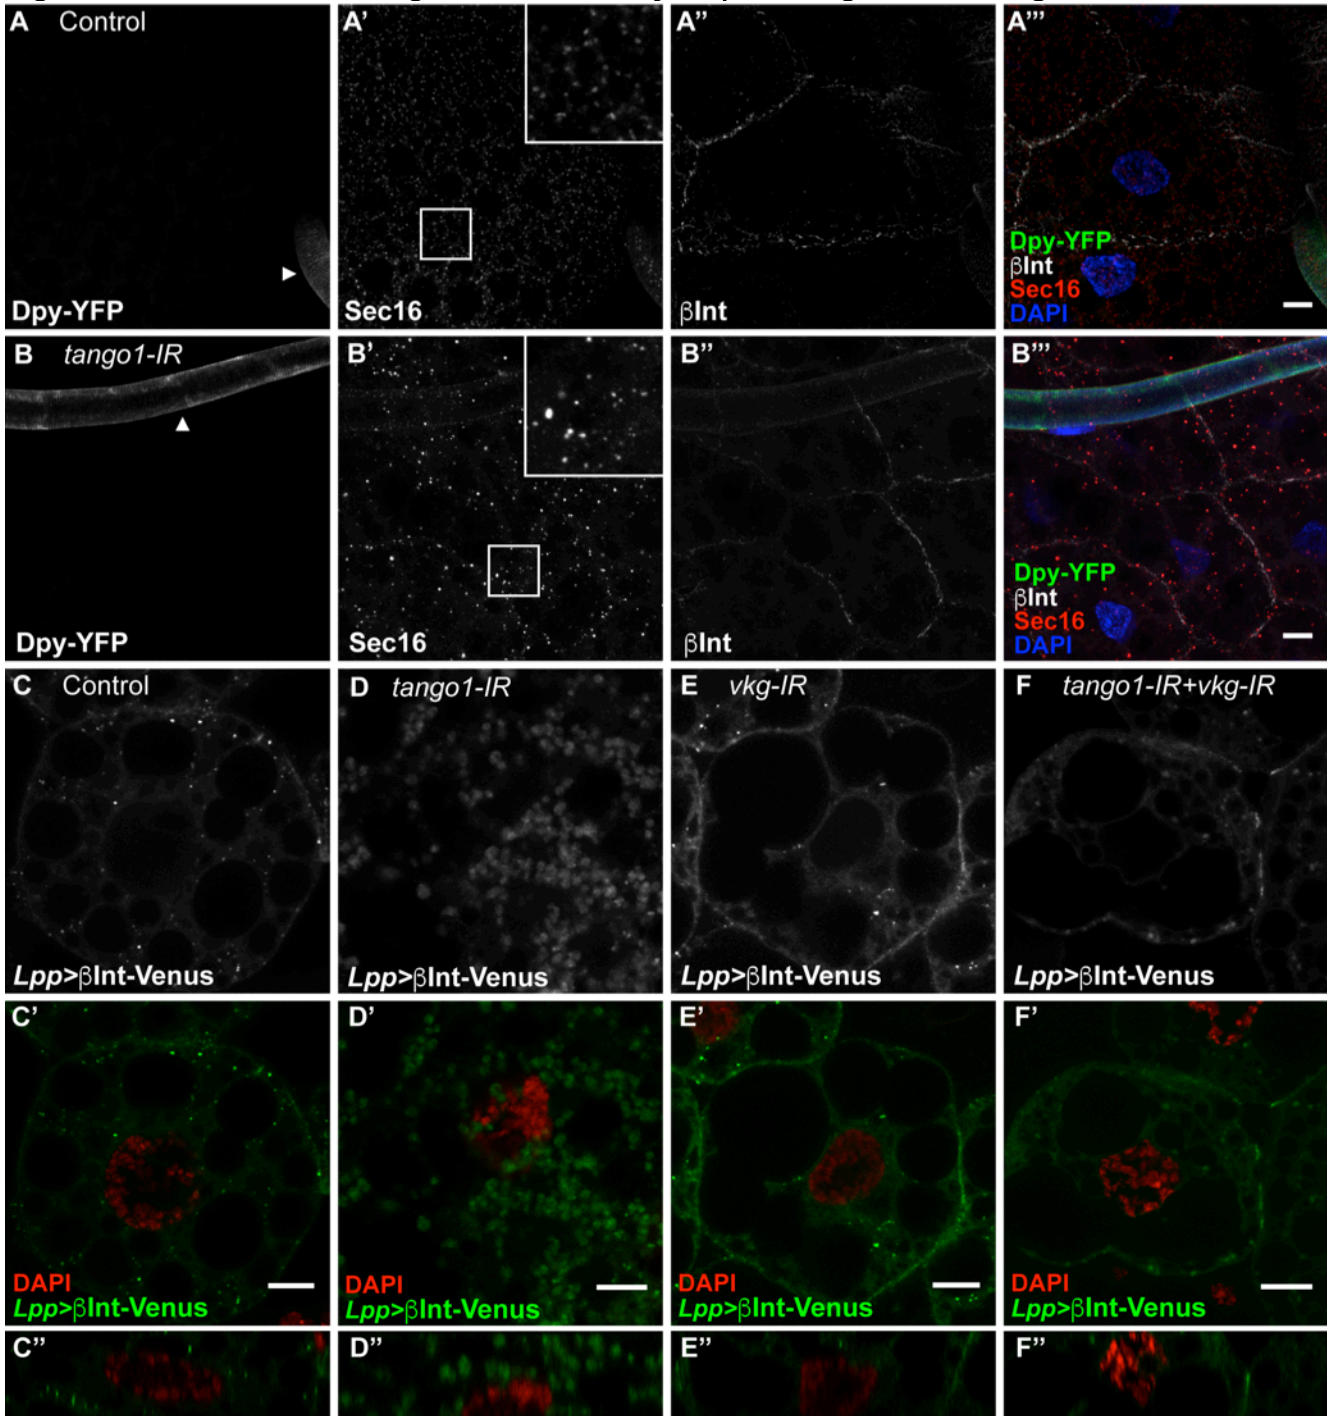

(A-B) Single z sections of fat body cells from Dpy-YFP larvae were stained for Sec16 and  $\beta$ PS integrin ( $\beta$ Int). Arrowheads point to tracheal tubes (not affected by transgenes expressed under *Lpp-gal4*) as positive control for Dpy-YFP expression. In the absence of *tango1* (B), the regular distribution of Sec16 is lost, whereas  $\beta$ Int is not affected. (C-F) Single z sections of fat body cells expressing  $\beta$ Int-Venus under *Lpp-gal4*. Control cells (C) are able to deliver  $\beta$ Int-Venus to the cell membrane, whereas *tango1-IR* cells (D) cannot. The absence of collagen (*vkg-IR*, E) does not affect  $\beta$ Int-Venus delivery. (F) Knocking down both *tango1* and *vkg* rescues membrane delivery of  $\beta$ Int-Venus. (C''-F'') Orthogonal views of the same cells. Scale bars are 10 $\mu$ m.

**Figure 5. Dependence on collagen of Laminin and SPARC secretion in fat body cells.**

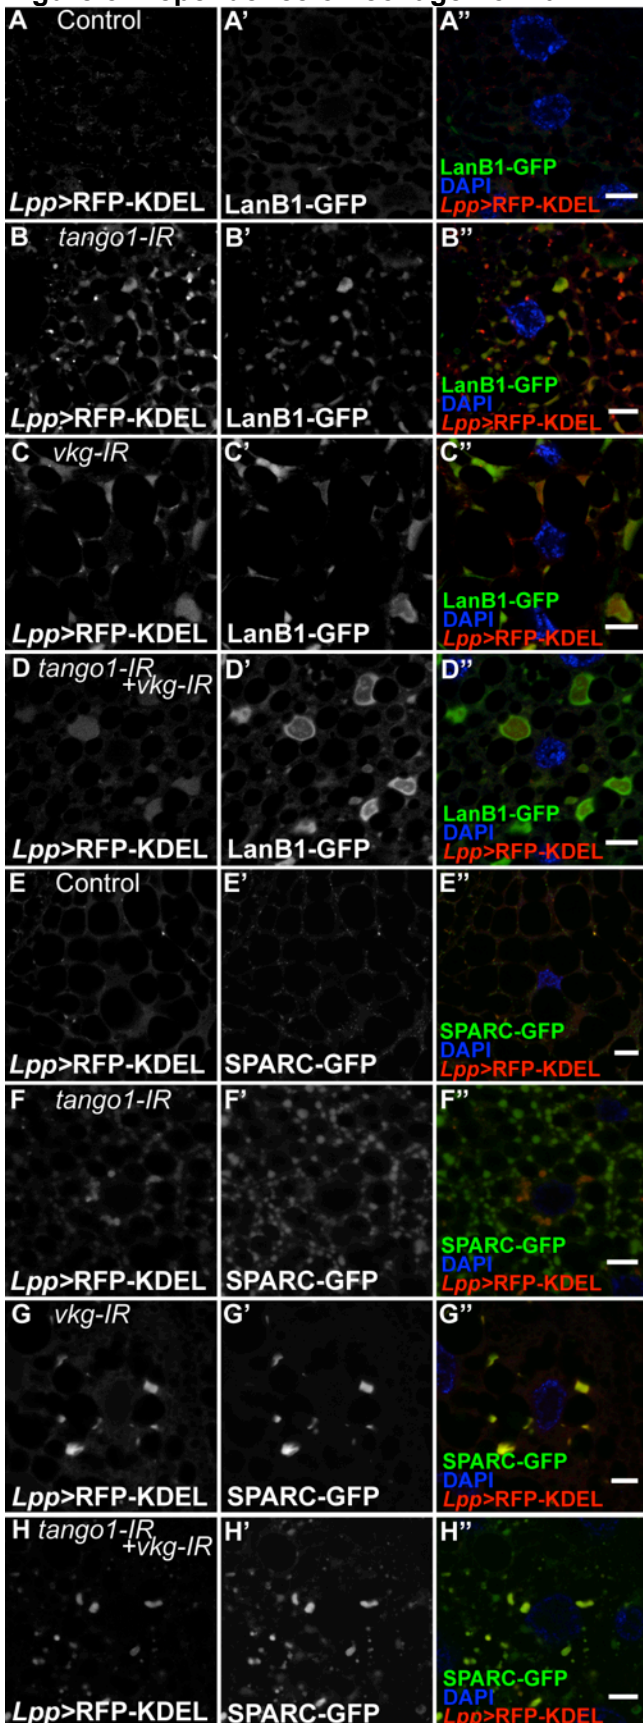

KDEL-RFP was expressed in fat body cells using *Lpp-gal4* in animals expressing LanB1-GFP (A-D) or SPARC-GFP (E-H) under their endogenous promoters (fTRG library). Both proteins are retained in the ER in the absence of Tango1 (B, F), collagen (C, G) or both (D, H). Scale bars are 10 $\mu$ m.

**Figure 6. Laminin accumulation in *tango1*-depleted cells can be suppressed by removing Dpy.**

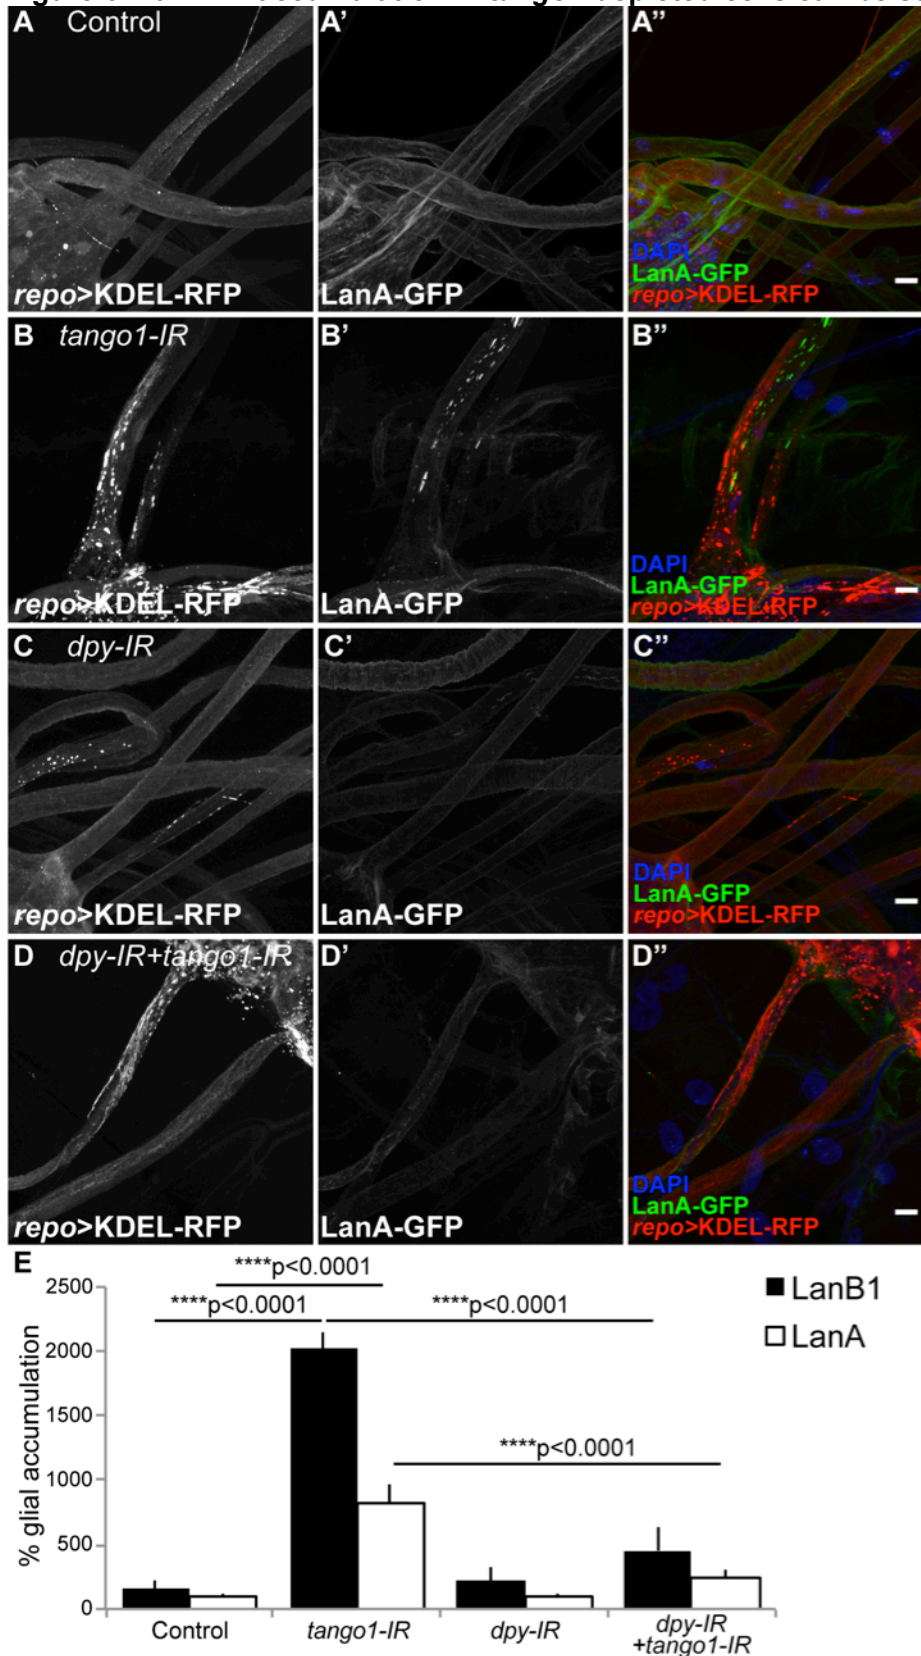

KDEL-RFP was expressed in glial cells using *repo-gal4* in animals expressing LanA-GFP under its endogenous promoter (fTRG library) in control cells (A), in cells expressing *tango1-IR* (B), *dpy-IR* (C) or both (D). *tango1-IR* induces LanA-GFP retention at the ER (B). While *dpy-IR* alone does not affect LanA-GFP distribution (C), it suppresses the *tango1*-induced LanA-GFP accumulation (D). (E) Quantification of the intracellular level of LanA and LanB1 with respect to that of control animals +/- SEM. Control, LanA n=4, LanB1 n=3; *tango1-IR*, LanA n=5, LanB1 n=3; *dpy-IR*, LanA n=6, LanB1 n=3; *tango1-IR+dpy-IR*, LanA n=7, LanB1 n=3. Significance was determined using one-way ANOVA and Tukey's multiple comparisons test. Scale bars are 10µm

**Figure 7. Effect of *tango1* and *dpy* knockdown on Crumbs and the ER stress response.**

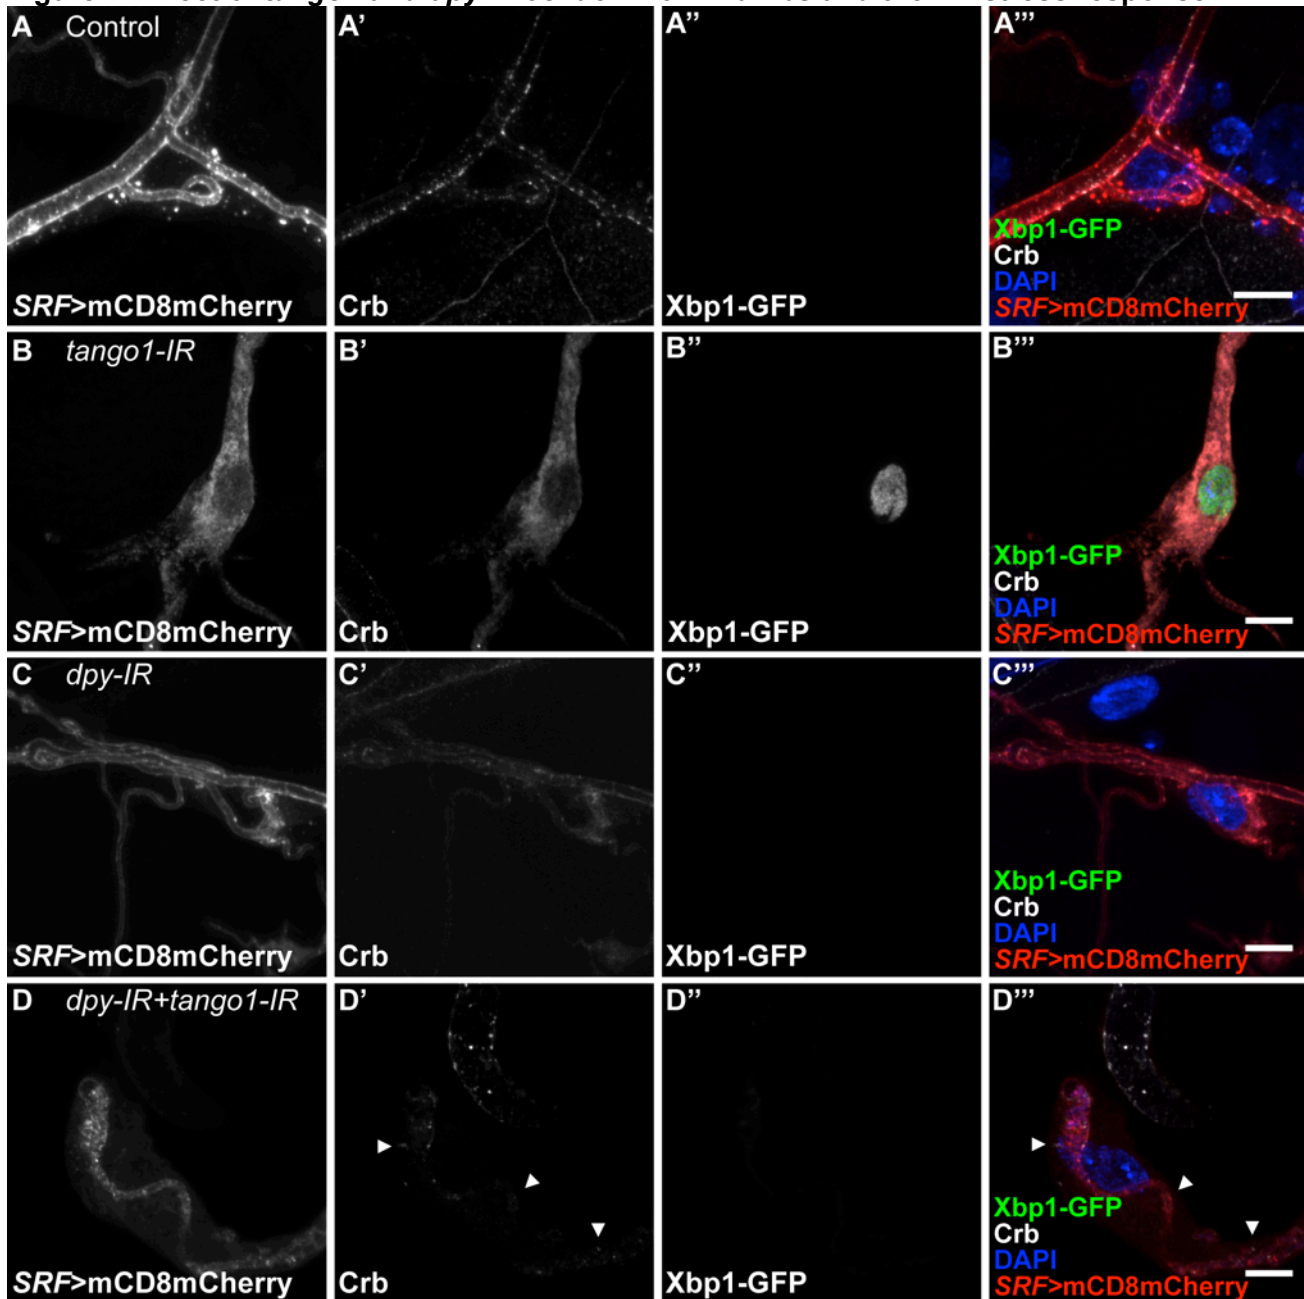

Terminal cells expressing mCD8mCherry and Xbp1-GFP under *SRF-gal4*. Xbp1-GFP is translated and accumulated in the nucleus only after activation of the ER-stress response (Ryoo, et al., 2007). In control (A) and *dpy-IR* cells (C), Crb localizes to the luminal membrane and Xbp1-GFP is not detectable. In *tango1-IR* cells (B), Crb is not able to localize to the luminal membrane and Xbp1-GFP accumulates in the nucleus. These defects can be suppressed by additionally knocking down *dpy* (D). Scale bars are 10µm.

**Figure 8. Rescue of cell morphology in *tango1*-depleted cells by removal of Dpy.**

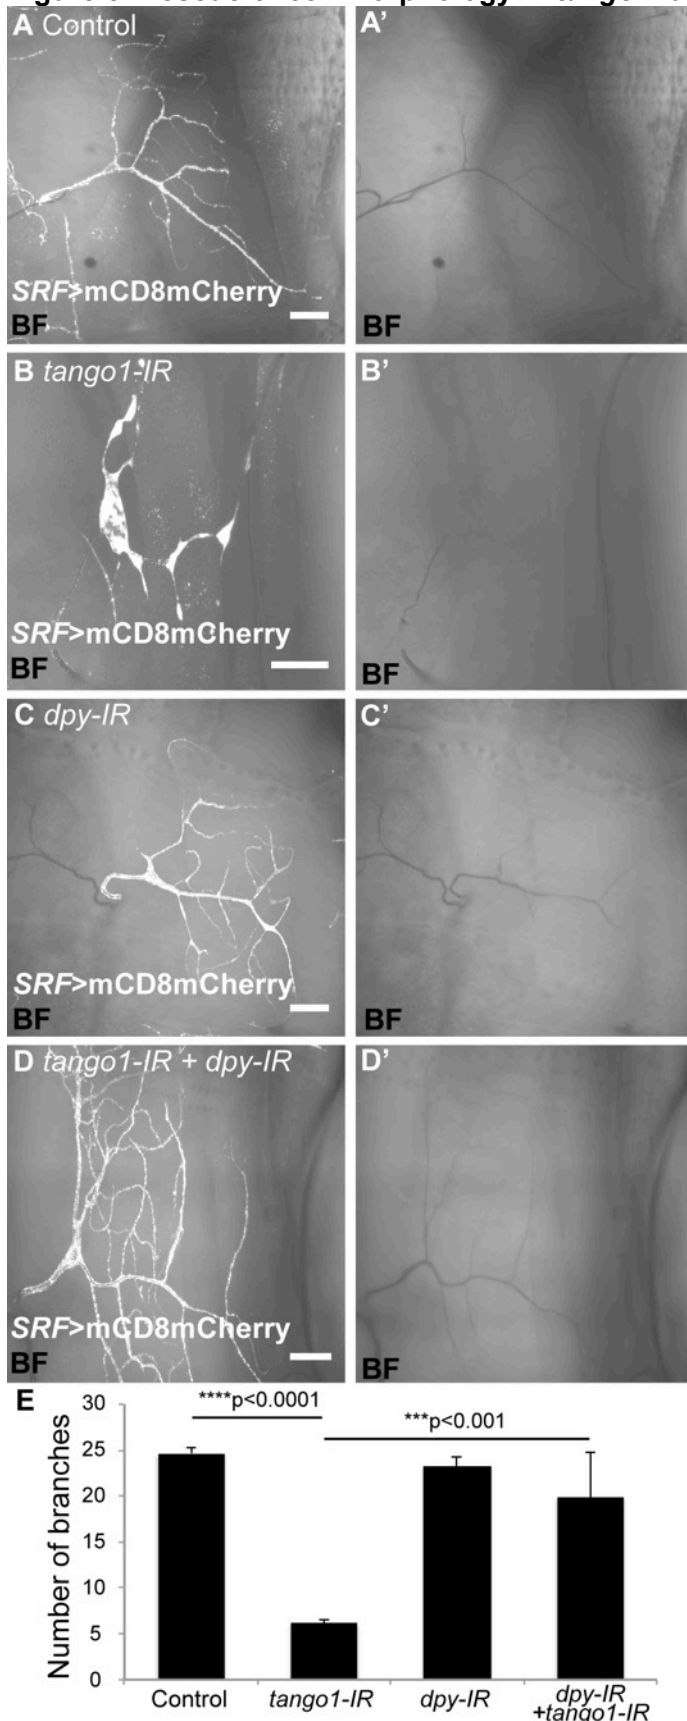

(A-D) Bright field (BF) and mCD8mCherry expression under the terminal cell-specific driver *SRF-gal4*. In control (A) and *dpy-IR* cells (C), branches are filled with gas, whereas the absence of *tango1* leads to failure of air-filling and reduced branching (B). Both defects are suppressed by additionally knocking down *dpy* (D). (E) Quantification of branching in (A-E). Bars represent mean  $\pm$  SEM. Control, n=4; *tango1-IR*, n=9; *dpy-IR*, n=8; *tango1-IR+dpy-IR*, n=8. Significance was determined using one-way ANOVA and Tukey's multiple comparisons test.



### Figure 9. Effect of loss of Tango1 and Dpy on Sec16 distribution

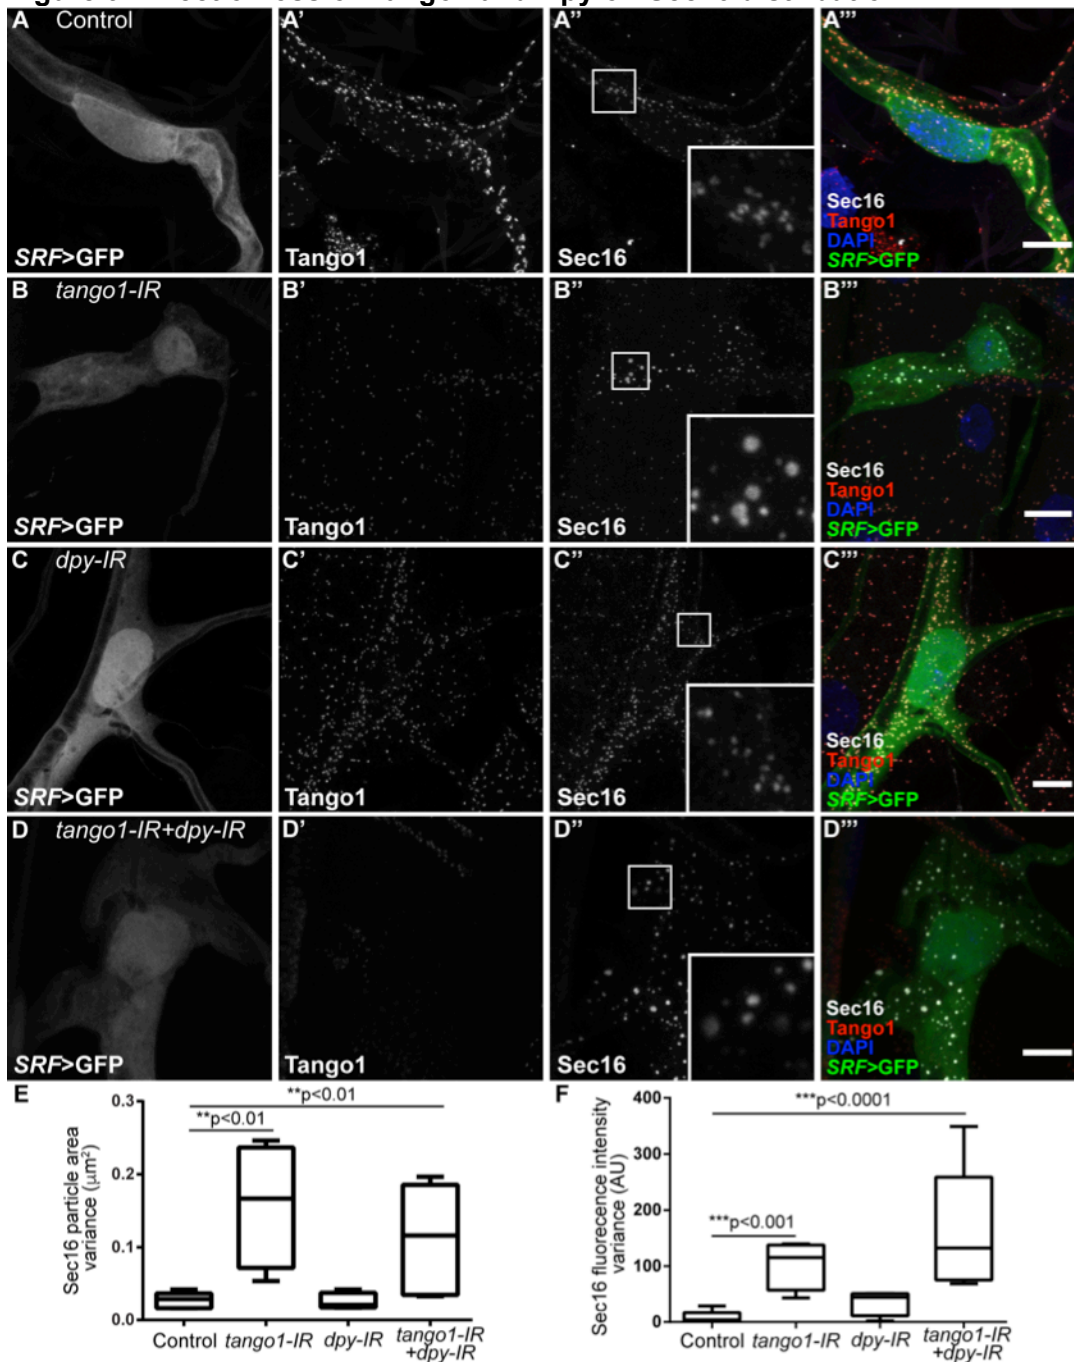

(A-D) Sec16 in terminal cells expressing GFP under *SRF-gal4*. In control (A) and *dpy-IR* cells (C), Sec16 particles are homogeneous in size and fluorescence intensity; in *tango1-IR* cells Sec16 particle size and fluorescence intensity is variable (B) and this variability is not altered by simultaneously removing Dpy (D). (E-F) Variance of Sec16 particle size (E) and of Sec16 fluorescence intensities (F). Control, n=5; *tango1-IR*, n=4; *dpy-IR*, n=4; *tango1-IR+dpy-IR*, n=5. Significance was determined using one-way ANOVA and Sidak's multiple comparisons test. Scale bars are 10 $\mu\text{m}$ .

**Figure 10. Effect of loss of Tango1 and Dpy on GM130 distribution.**

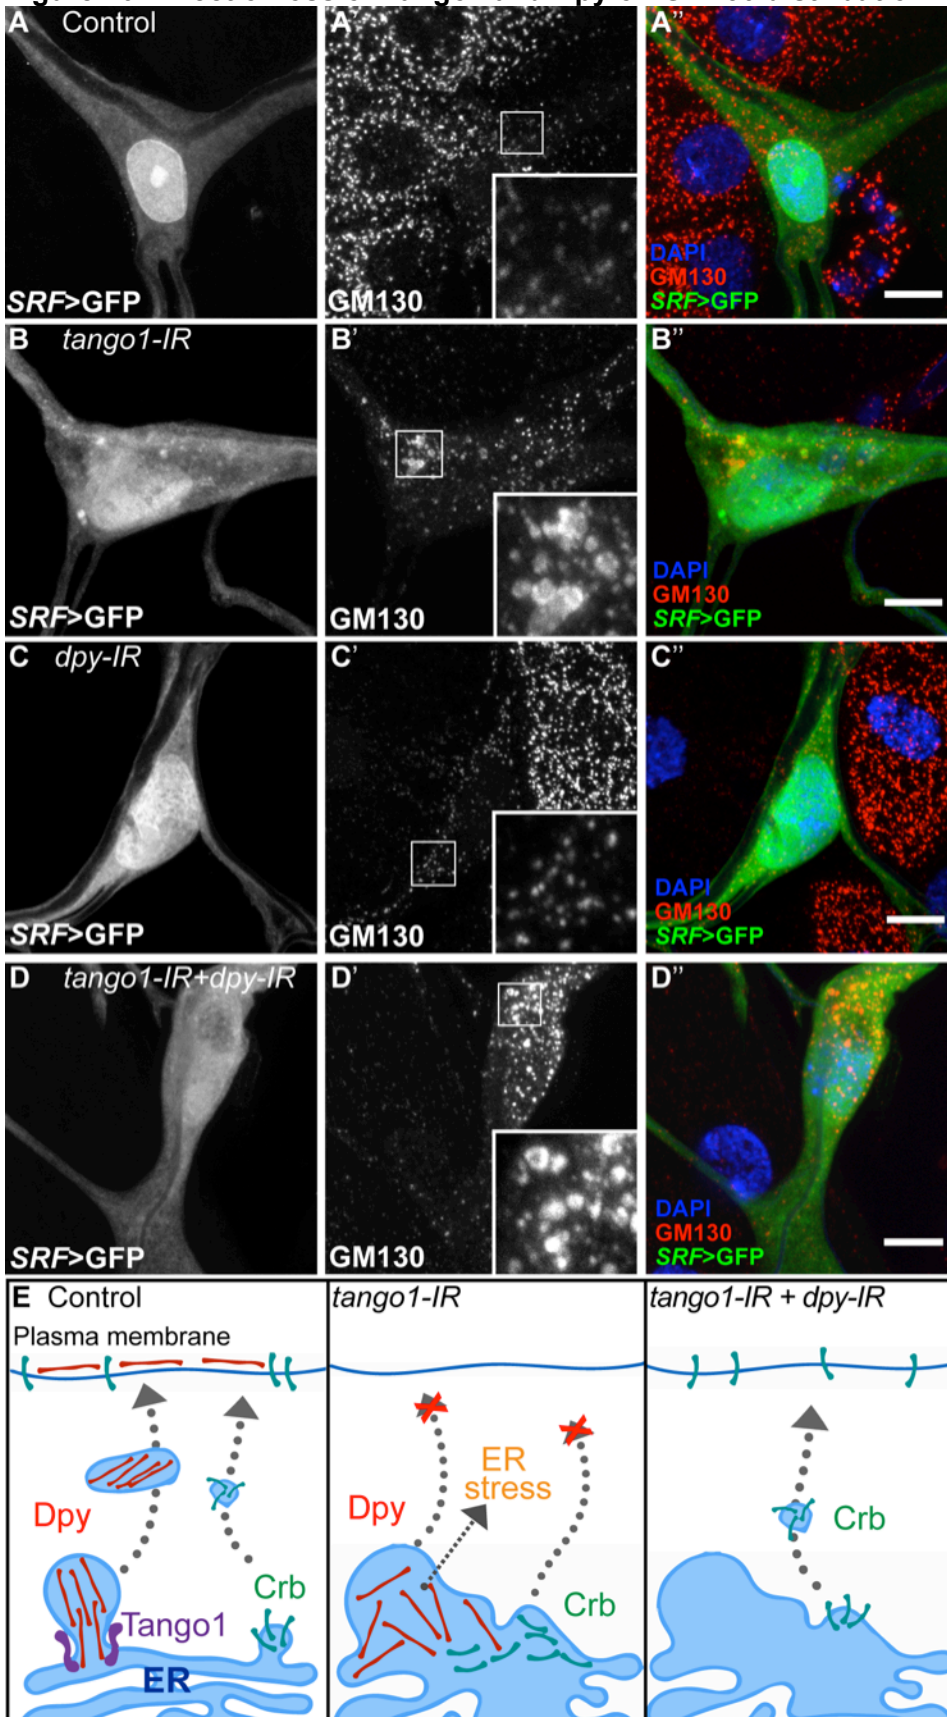

(A-D) Terminal cells expressing GFP under *SRF-gal4*, and stained for the Golgi marker GM130. In control (A) and *dpy-IR* cells (C), the distribution and size of GM130-labelled structures is homogeneous whereas in *tango1-IR* cells GM130 is seen in heterogeneous aggregates (B). Knocking down *dpy* in *tango1-IR* cells does not rescue GM130 distribution (D). Scale bars are 10 $\mu$ m. (E) Model showing the role of Tango1 in Dpy trafficking and the indirect consequences of Dpy blockage. In the absence of Tango1, the structure of the ER is changed, the ER stress response is activated and neither Dpy nor Crb reach the plasma membrane. If Dpy levels are reduced, the ER stress response is no longer active and Crb can be secreted. However, the ER morphology is not restored.
